# Supplementary material for: A symmoriiform from the Late Devonian of Morocco demonstrates a derived jaw function in ancient chondrichthyans
Source: PubMed Central journal article supplement (PMC7672094; doi:10.1038/s42003-020-01394-2), 2020-11-17
Supplement: 42003_2020_1394_MOESM1_ESM.pdf [file 42003_2020_1394_MOESM1_ESM.pdf]

1 **Supplementary information**

2

3 **A symmoriiform from the Late Devonian of Morocco demonstrates a**  
4 **derived jaw function in ancient chondrichthyans**

5

6 Linda Frey, Michael I. Coates, Kristen Tietjen, Martin Rücklin and Christian Klug

7

8 **Content**

|    |                                           |    |
|----|-------------------------------------------|----|
| 9  | Supplementary Figures 1 to 8              | 2  |
| 10 | Supplementary Note 1 - Gape measurements  | 10 |
| 11 | Supplementary Note 2 – Cladistic analyses | 10 |
| 12 | Taxon list                                | 11 |
| 13 | Character list                            | 15 |
| 14 | Syapomorphy list                          | 28 |
| 15 | Supplementary References                  | 29 |

16

17

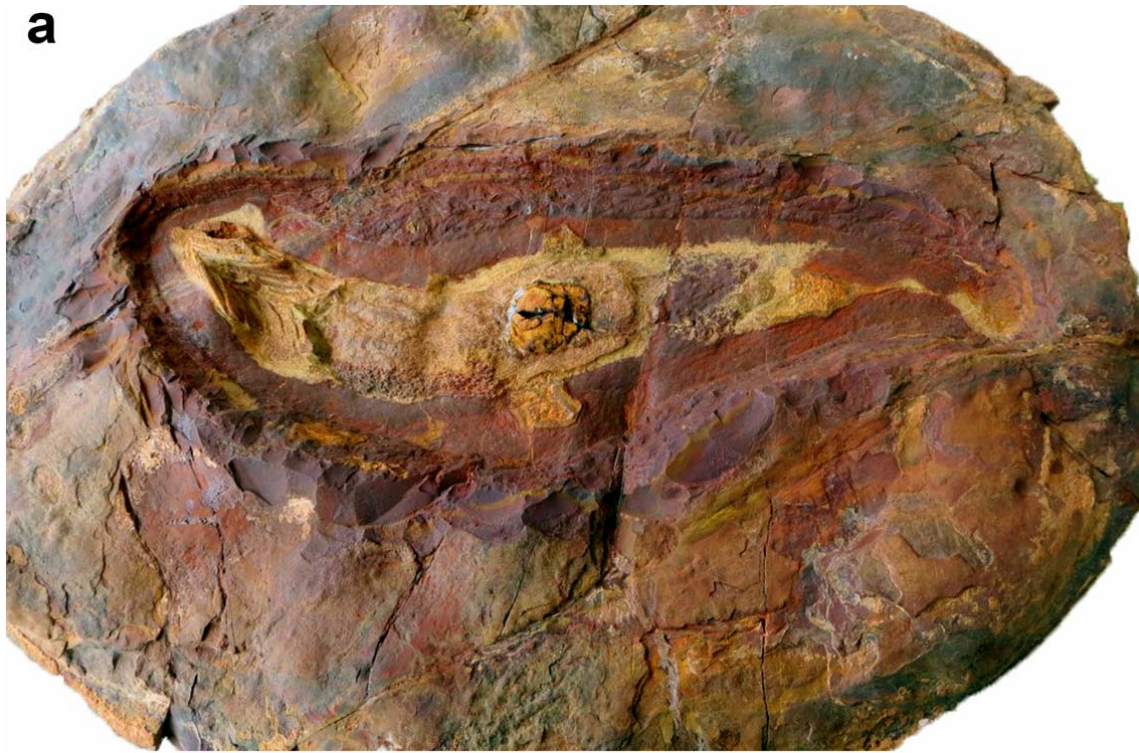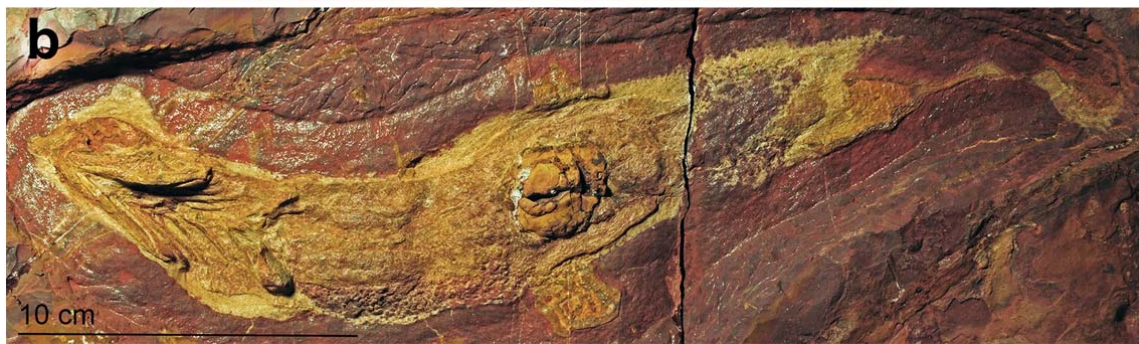

18

19 **Supplementary Fig. 1.** *Ferromirum oukherbouchi* gen. et sp. nov. Holotype. **a**, the  
20 entire nodule, which was later reduced to facilitate CT-scanning. **b**, detail of a.

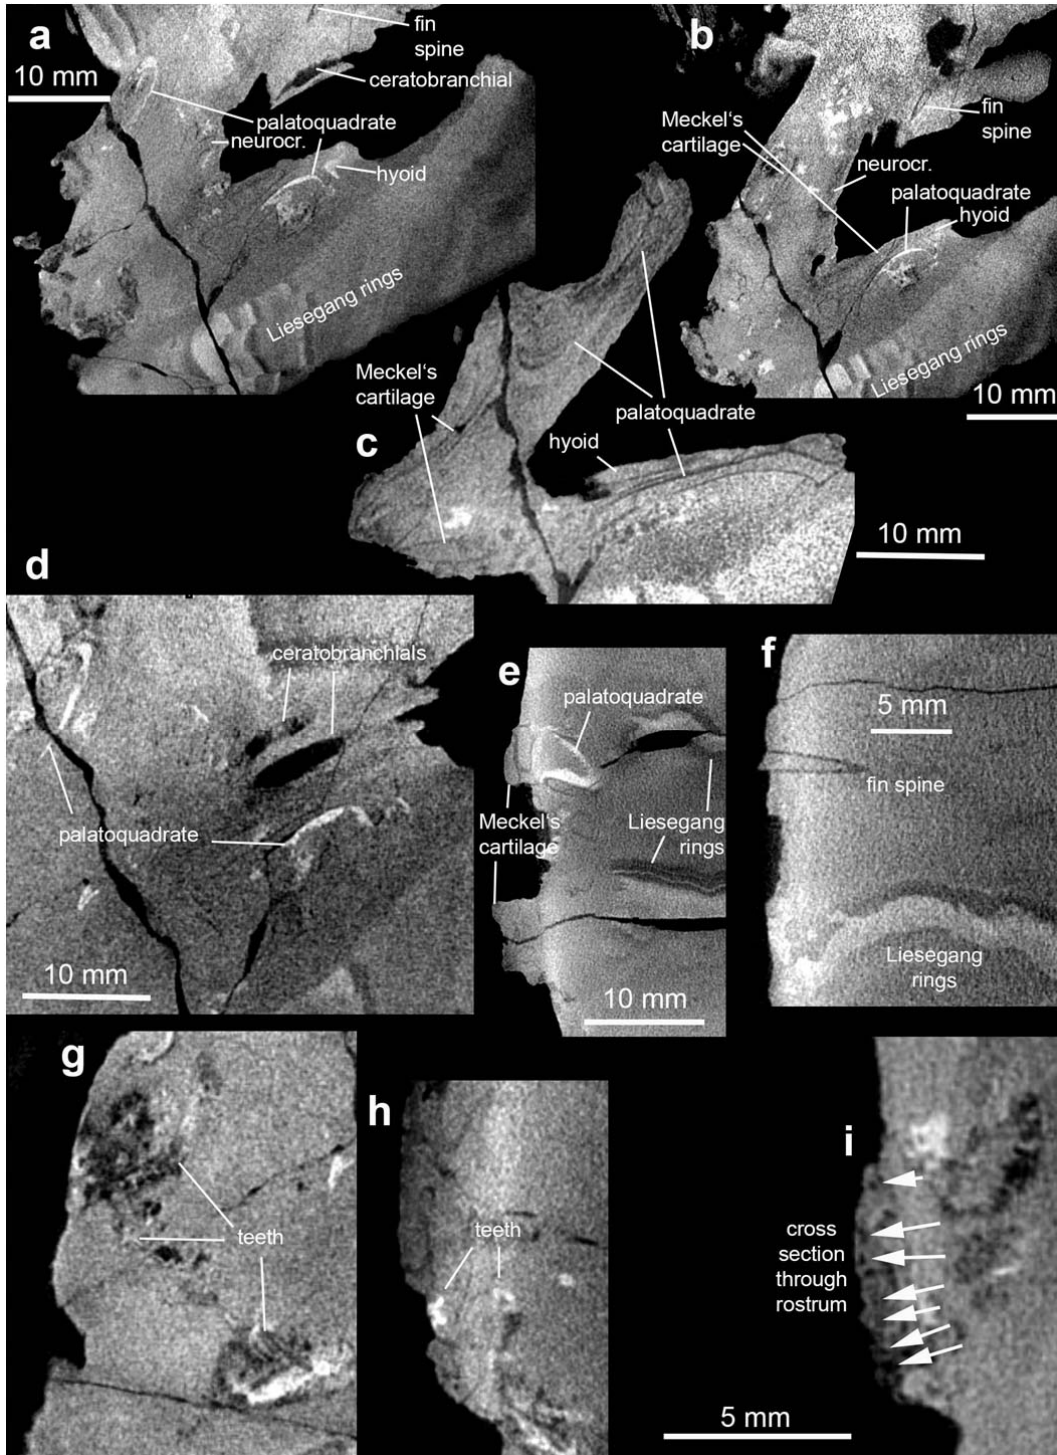

21

22 **Supplementary Fig. 2.** Images taken from the dcm-stack of *Ferromirum*  
 23 *oukherbouchi* gen. et sp. nov. a to d, g, h, planes parallel to bedding. e, f, i, planes  
 24 perpendicular to bedding and the plane of bilateral symmetry of the animal. Arrows in  
 25 i point at the minute circular pits that might represent traces of electroreceptive or  
 26 mechanoreceptive organs. g to i share the same scale bar at the bottom.  
 27

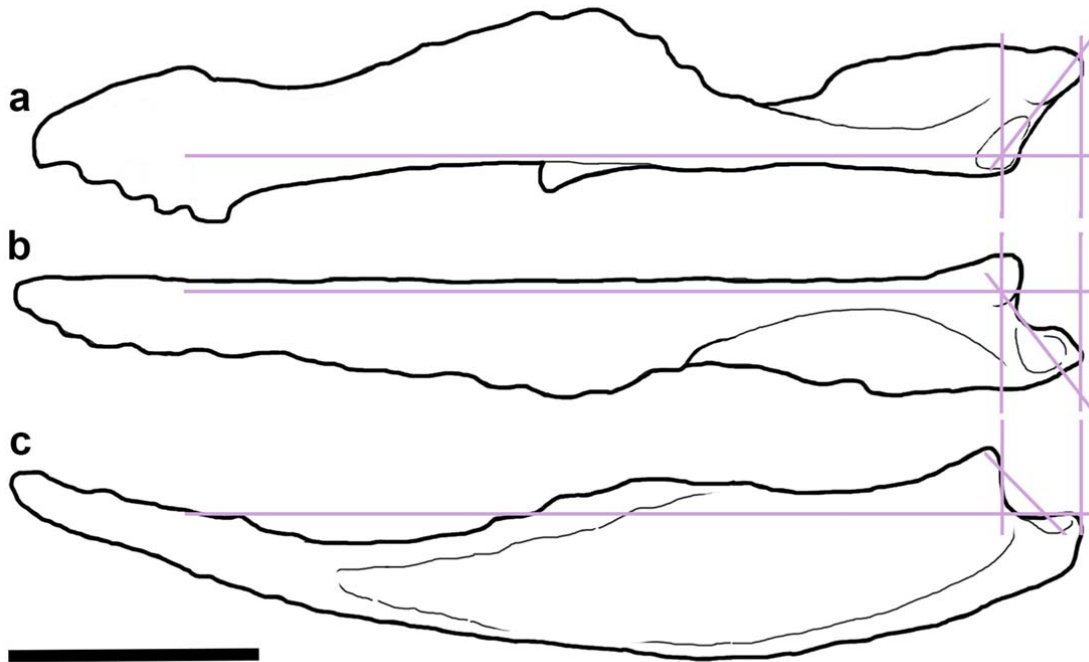

28

29 **Supplementary Fig. 3.** *Ferromirum oukherbouchi* gen. et sp. nov. Both jaws restored  
30 to show width of dental platform and offset angle of articulation surfaces. Scale bar is  
31 10 mm. **a**, Palatoquadrate (left side) in ventral view. **b**, Meckel's cartilage (left side) in  
32 dorsal and, **c**, lateral view. Anterior to left of figure. For explanations of the method to  
33 measure the angle see Supplementary Note 1 - Gape measurements.

34

35

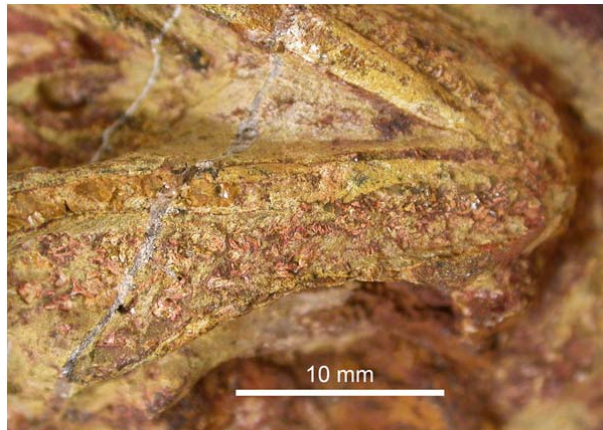

36

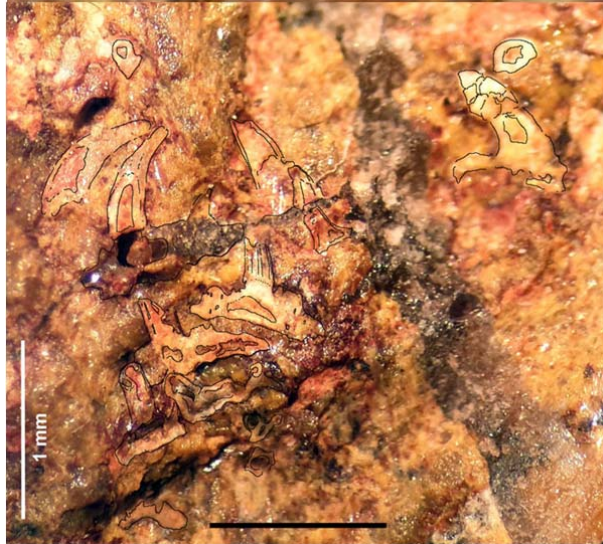

37 **Supplementary Fig. 4.** *Ferromirum oukherbouchi* gen. et sp. nov. dentition. Top:  
38 overview over left ramus of Meckel's cartilage with corroded dentition. Bottom: detail  
39 to show tooth morphology and tooth family arrangement. Morphological details traced  
40 with black lines.

41

42

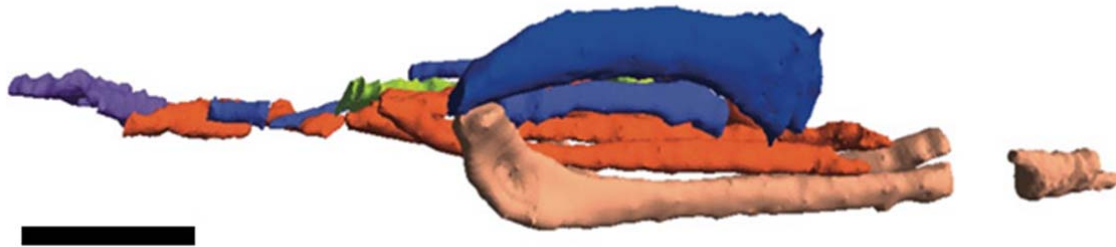

43

44 **Supplementary Fig. 5.** *Ferromirum oukherbouchi* gen. et sp. nov. hyoid arch and gill  
45 skeleton in lateral view (right side, anterior to right of figure). Scale bar is 10 mm long.  
46 Hyomandibula in dark blue; ceratohyal and hypohyal in pale brown.

47

48

49

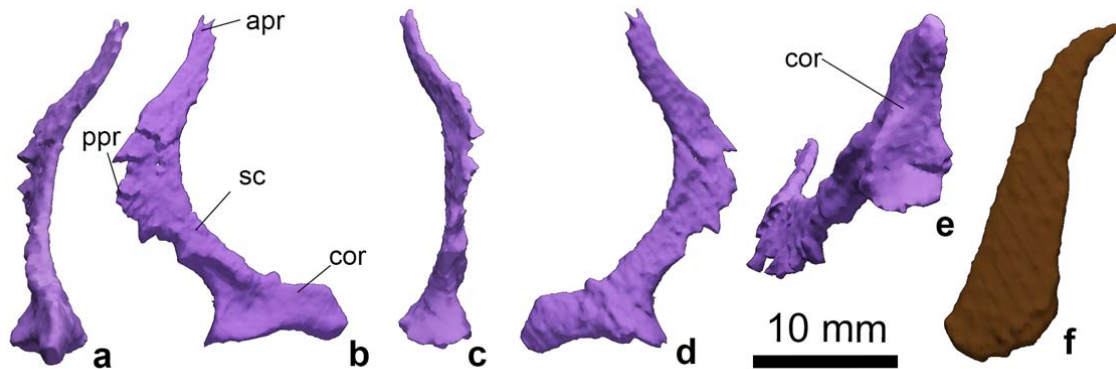

50

51 **Supplementary Fig. 6.** Pectoral girdle of *Ferromirum oukherbouchi* gen. et sp. nov.  
52 a to e, right scapulocoracoid in anterior (a), lateral (b), posterior and slightly dorsal  
53 (c), mesial (d), and ventral views. f, lateral view of dorsal fin spine; note the recurved  
54 tip. The transverse striation is an artefact from scanning and rendering.  
55 Abbreviations: apr (anterior process); cor (coracoid); ppr (posterior process); sc  
56 (scapula).

57

58

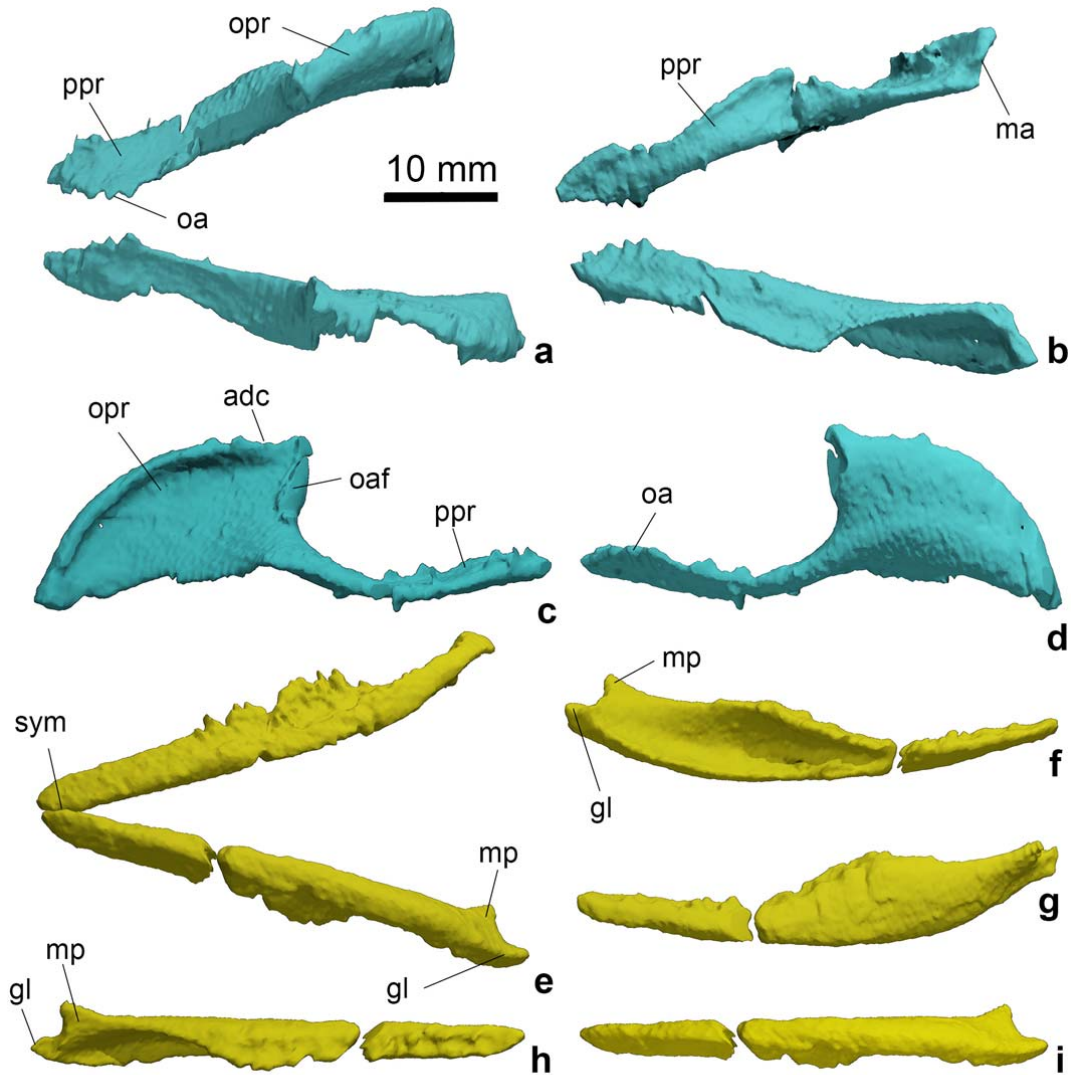

61 **Supplementary Fig. 7.** *Ferromirum oukherbouchi* gen. et sp. nov. jaws restored. a to  
 62 d, palatoquadrates. a, dorsal, and b, ventral views. c, lateral (external) and d, mesial  
 63 (internal) views of right palatoquadrate. e to i, Meckel's cartilage. e, ventral view. f,  
 64 lateral (labial) view of right ramus. g, mesial (lingual) and slightly dorsal view of right  
 65 ramus - hence mesial process of articulation level with glenoid (cotylus). h, dorsal  
 66 view of right ramus. i, ventral view of right ramus. Abbreviations: gl (glenoid); ma  
 67 (mandibular articulation); mp (mesial process); ppr (palatine process); oa (orbital  
 68 articulation); oaf (otic articulation facet); opr (otic process); sym (symphysis).

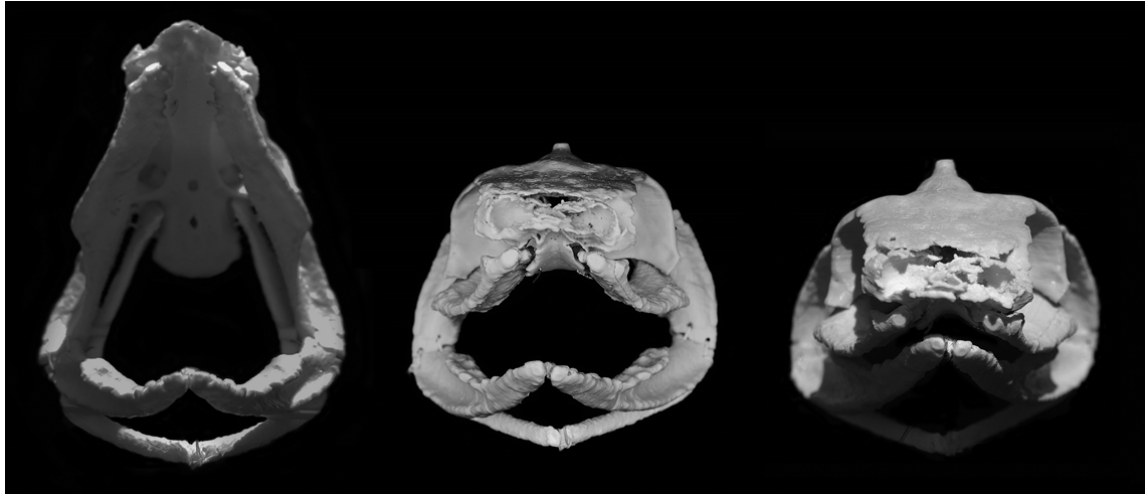

69

70 **Supplementary Fig. 8.** Composite model of *Ferromirum oukherbouchi* gen. et sp.  
71 nov. jaws and hyoid arch and *Dwykasselachus* neurocranium in anterior view, gapes  
72 of ~50 degrees, ~20 degrees, and closed.

73



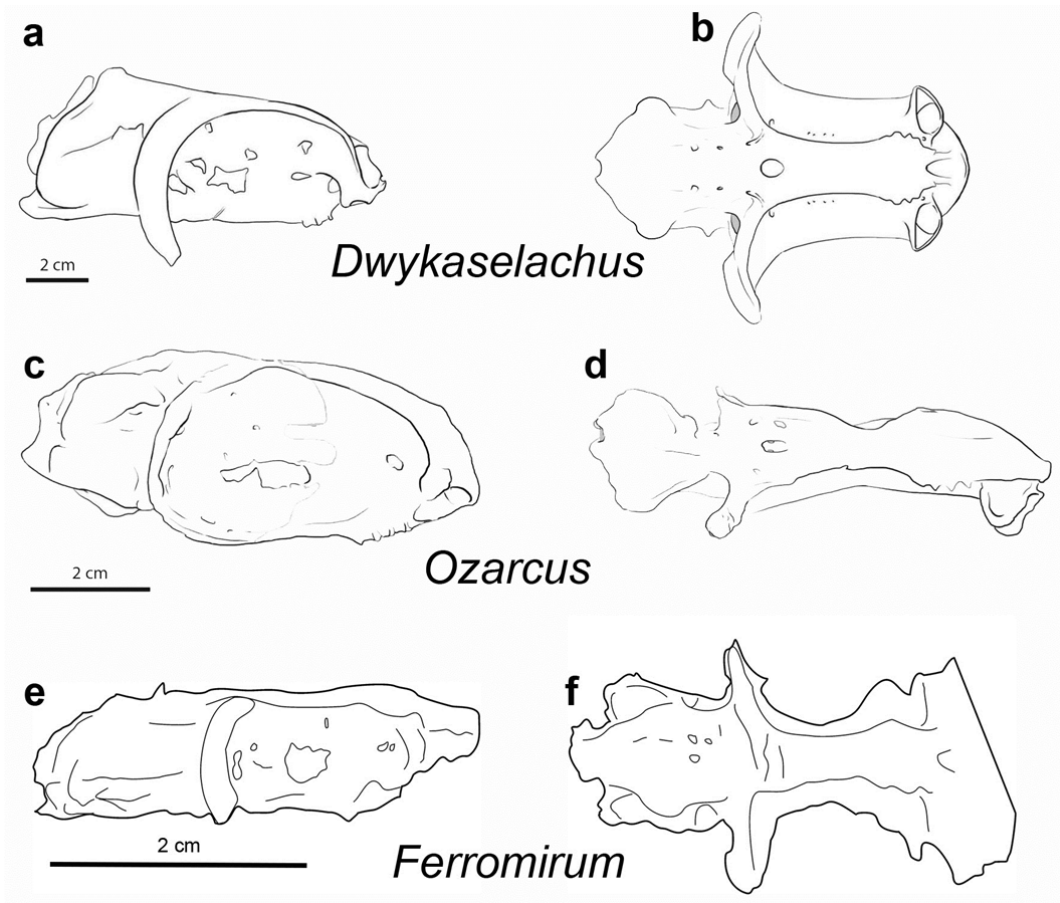

75

76 **Supplementary Fig. 9.** Comparison of neurocrania of the Palaeozoic  
 77 chondrichthyans *Dwykasselachus* (a, b), *Ozarcus* (c, d), and *Ferromirum* (e, f). Except  
 78 *Ferromirum*, all drawing from Coates et al. (2016). Right (b, d, f): right lateral views;  
 79 left (a, c, e): ventral views.

80

81

## 82 **SUPPLEMENTARY NOTE 1 – GAPE MEASUREMENTS**

83 Gape angles and angles of lower jaw rotation (roll) were measured directly from the physical  
84 model of the composite symmoriid skull. For the gape angle, a horizontal rod was inserted  
85 between the quadrates at the level of the mesial articulation surface. The distance from the rod  
86 midpoint to the mandibular symphysis was measured (105 mm), and the same distance used  
87 to mark a midline location at the anterior of the palate (approximated by blue lines, Fig. 6a).  
88 A slender (2 mm diameter) wooden dowel rod of measured length was inserted to span the  
89 gap between mandibular symphysis and marked palatal location. This dowel was cut shorter  
90 by arbitrary lengths (recorded) so that the gape was reduced through a series of irregularly  
91 spaced, but measured, intervals.

92 For the rotation angle, a 60 mm rod was attached to the dental platform of Meckel's cartilage  
93 at the level of the recess of the second tooth set (counting from rear), where the platform is  
94 widest. The rod was fixed so that when the jaws were closed, the rod projected laterally and  
95 parallel to a second rod laid across both lower jaws at the same antero-posterior level. The  
96 distal tip of the second rod was aligned with that of the first. At different degrees of gape span  
97 (dictated by gape-spaced rod length), the distance between distal tips of these jaw rods varied  
98 (approximated by red lines, Fig. 6a) and was measured.

99 In both instances (gape and jaw rotation), measured sides of triangles were used to calculate  
100 angle subtended by lengthening or shortening side. The procedure was repeated using a series  
101 of 'gape' rods, with successive shortening. The scattered plot (Fig. 6b) reflects imperfections  
102 in the physical model: unevenness of the jaw joint articulation surfaces and wobble at the jaw  
103 joint.

104

## 105 **SUPPLEMENTARY NOTE 2 – CLADISTIC ANALYSES**

106 Bootstrap values (Felsenstein 1985) were calculated in PAUP\* using the stepwise addition  
107 option with 10,000 replicates. Bremer decay indices were calculated through searches using  
108 1,000 random sequence additions with a limit of 300,000 trees saved at each increment. At  
109 one extra step, crown group resolution is lost within a strict consensus of all trees. This is  
110 attributable to the inclusion of extremely incomplete taxa such as *Gogoselachus*, for which  
111 82% of character scores are unknown, uncertain, or inapplicable. Notably, *Gogoselachus*  
112 exclusion has no effect on the topology of the strict consensus of most parsimonious trees. For  
113 this reason, the calculation of Bremer decay analyses excluded *Gogoselachus*. Character state  
114 transitions by node for the strict consensus cladogram of the MPTs were reconstructed in  
115 PAUP\*<sup>31</sup> employing DELTRAN optimization, employing the complete taxon set.

116

117 **Taxon and Character lists**

118

119 **Nexus file: Ferro10 (inc.Gogo).nex**

120

121 **Taxon list updates relative to Frey *et al.* 2019 matrix.**

122 *Gogoselachus*: Long *et al.* 2015; *Gutterensis*: Sequeira & Coates 2000; *Gydoselache*: Maisey *et al.*  
123 2019; *Helodus*: Patterson 1965; Stahl 1999; Coates *et al.* in press; Johanson *et al.* in press;  
124 *Ptomacanthus*: Brazeau 2009, 2012; Denison 1979; Miles 1973a; Dearden *et al.* 2019; *Tristychius*:  
125 Dick1978; Coates & Gess 2007; Coates & Tietjen 2018; Coates *et al.* 2019.  
126

127 **Character list updates relative to Frey *et al.* 2019 matrix.**

128 Discussion, notes, and references supplied in character list.

- 129 16. Cranial sensory line canal passes between or beneath scales (0); passes over scales and/or is  
130 partially enclosed or surrounded by scales (1); perforates and passes through scales (2).
- 131 17. Postcranial sensory line canal passes between or beneath scales (0); passes over scales and/or  
132 is partially enclosed or surrounded by scales (1); perforates and passes through scales (2).
- 133 47. Opercular cover of branchial chamber complete or partial (0); separate gill covers and gill slits  
134 (1).
- 135 49. Gill skeleton mostly beneath otico-occipital region (0); mostly posterior to occipital region (1).
- 136 50. First branchial arch meets neurocranium ventral to otic region (0); posterior to otic region (1).
- 137 53. Ceratohyal with posterior/proximal external fossa: absent (0); present (1).
- 138 54. Ceratohyal with broad posteroventral flange or shelf, projecting laterally into recess in  
139 Meckel's cartilage: absent (0); present (1).
- 140 55. Ceratohyal spatulate or bladed anteriorly: absent (0); present (1).
- 141 56. Hypohyals: absent (0); present (1).
- 142 57. Basihyal: absent, hyoid arch articulates directly with basibranchial (0); present (1).
- 143 63. Multiple unpaired basibranchial mineralisations absent (0); present (1).
- 144 64. Elongate posterior copula projects posteriorly, beyond rearmost branchial arch: absent (0);  
145 present (1).
- 146 96. Meckel's cartilage with flange or shelf projecting posteriorly from the lateral cotylus (glenoid):  
147 absent (0); present (1).
- 148 112. Large prootic foramen separated from optic fenestra by antotic pillar bearing optic pedicel:  
149 absent (0); present (1).
- 150 177. Posterior openings of lateral aortic canals positioned lateral to occipital cotylus: absent (0);  
151 present (1).
- 152 218. Dorsal fin spine apex curved posteriorly: absent (0); present (1).
- 153

154 **Taxa and Sources**

- 155 *Acanthodes*: Benznosov 2009; Brazeau & de Winter 2015; Coates 1994; Davis *et al.* 2012; Heidtke  
156 1993, 2011a,b; Jarvik 1977, 1980; Miles 1968, 1973a, b; Nelson 1968; Watson 1937.
- 157 *Acronemus*: Maisey 2011; Rieppel 1982.
- 158 *Akmonistion*: Coates & Sequiera 1998, 2001a, b; Coates *et al.* 1998; Coates *et al.* 2017.
- 159 *Brachyacanthus*: Denison 1979; Miles 1973a; Watson 1937.
- 160 *Brochoadmones*: Bernacsek & Dineley 1977; Gagnier & Wilson 1996b; Hanke & Wilson 2006.
- 161 *Callorhinchus/Hydrolagus*: Cole 1896; De Beer 1937; De Beer & Moy-Thomas 1935; Didier 1995;  
162 Didier *et al.* 1994, 1998, 2012; Howard *et al.* 2013; Kesteven 1937; Patterson 1965, 1992; Pradel  
163 *et al.* 2013; Stahl 1999.
- 164 *Cheiracanthus*: Denison 1979; Miles 1973a; Watson 1937.
- 165 *Cheirolepis*: Arratia & Cloutier 1996; Pearson & Westoll 1979; Giles *et al.* 2015a.
- 166 *Chondrenchelys*: Finarelli & Coates 2012, 2014; Lund 1982; Moythomas 1935.
- 167 *Cladodoides*: Gross 1937, 1938; Maisey 2005.
- 168 *Cladoselache*: Bendix-Almgreen 1975; Harris 1938a, b; Maisey 1989a, 2007; Schaeffer 1981;  
169 Williams 2001; Woodward & White 1938.
- 170 *Climatius*: Miles 1973a, b; Watson 1937.
- 171 *Cobelodus*: Zangerl & Case 1976; Zidek 1992.
- 172 *Culmacanthus*: Long 1983.
- 173 *Damocles*: Lund 1986.
- 174 *Debeerius*: Grogan & Lund 2000.
- 175 *Diplacanthus*: Gagnier 1996; Miles 1973a; Watson 1937.
- 176 *Diplodoselache*: Dick 1981.
- 177 *Doliodus*: Miller *et al.* 2003; Maisey *et al.* 2009, 2013, 2017; Long *et al.* 2015.
- 178 *Dwykasselachus*: Coates *et al.* 2017; Oelofsen 1986.
- 179 *Egertonodus*: Maisey 1982, 1983; Lane, 2010.
- 180 *Entelognathus*: Zhu *et al.* 2013.
- 181 *Ferromirum oukherbouchi* gen. et sp. nov.: holotype specimen PIMUZ XX.

- 182 *Gladbachus*: Heidtke & Krätschmer 2001; Heidtke 2009; Burrow & Turner 2013; Coates 2005;  
183 Coates *et al.* 2018.
- 184 *Gogoselachus*: Long *et al.* 2015.
- 185 *Guiyu*: Zhu *et al.* 2009.
- 186 *Gutterensis*: Sequeira & Coates 2000.
- 187 *Gydoselache*: Maisey *et al.* 2019.
- 188 *Gyracanthides*: Miles 1973a; Warren *et al.* 2000; Turner *et al.* 2005.
- 189 *Halimacanthodes*: Burrow *et al.* 2012.
- 190 *Hamiltonichthys*: Maisey 1989b.
- 191 *Helodus*: Patterson 1965; Stahl 1999; Coates *et al.* in press; Johanson *et al.* in press.
- 192 *Homalacanthus*: Gagnier 1996; Watson 1937.
- 193 *Homalodontus*: Mutter *et al.* 2007, 2008.
- 194 *Iniopera*: Zangerl & Case 1973; Pradel *et al.* 2009b, Pradel 2010; Pradel *et al.* 2010.
- 195 *Ischnacanthus*; Miles 1973a; Watson 1937.
- 196 *Kawichthys*: Pradel *et al.* 2011.
- 197 *Kathemacanthus*: Gagnier & Wilson 1996a; Hanke & Wilson 2010.
- 198 *Latviacanthus*: Schultze & Zidek 1982.
- 199 *Lupopsyrus*: Hanke & Davis 2012; Bernacsek & Dineley 1977.
- 200 *Mesacanthus*: Miles 1973a; Watson 1937.
- 201 *Mimipiscis*: Gardiner & Bartram 1977; Gardiner 1984; Choo 2011; Giles & Friedman 2014.
- 202 *Moythomasia*: Gardiner & Bartram 1977; Gardiner 1984; Coates *et al.* 2017; specimen MV P222915.
- 203 *Obtusacanthus*: Hanke & Wilson 2004; specimen UALVP 41488.
- 204 *Onychoselache*: Dick & Maisey 1980; Coates & Gess 2007.
- 205 *Orthacanthus*: Hampe 2003; Heidtke 1982, 1999; Hotton 1952; Schaeffer 1981; Maisey 1983; Lane &  
206 Maisey 2009.
- 207 *Ozarcus* and FMNH PF 13242: Maisey 2007; Pradel *et al.* 2014; Coates *et al.* 2017.
- 208 *Parexus*: Watson 1937; Miles 1973a.
- 209 *Phoebodus*: Frey *et al.* 2019
- 210 *Psarolepis*: Yu 1998; Zhu & Schultze 1997; Zhu *et al.* 1999; Qu *et al.* (2013a).

- 211 *Ptomacanthus*: Brazeau 2009, 2012; Denison 1979; Miles 1973a; Dearden *et al.* 2019.
- 212 *Pucapampella*: Maisey 2001a; Maisey & Anderson 2001; Maisey & Lane 2010; Janvier & Maisey  
213 2010; Maisey *et al.* 2019.
- 214 *Raynerius*: Giles *et al.* 2015b.
- 215 *Rhadinacanthus*: Burrow *et al.* (2016).
- 216 *Squalus*: Schaeffer 1981; Gans & Parsons 1964; Marinelli & Strenger 1959.
- 217 *Synechodus*: Maisey 1985.
- 218 *Tamiobatis*: Schaeffer 1981.
- 219 *Tetanopsyrus*: Gagnier & Wilson 1995; Gagnier *et al.* 1999; Hanke *et al.* 2001.
- 220 *Thrinacodus*: Grogan & Lund 2008.
- 221 *Tribodus*: Maisey & de Carvalho 1997; Lane 2010; Lane & Maisey 2009, 2012.
- 222 *Triodus*: Solér-Gijón, R. & Hampe 1998; Hampe 2003; Heidtke *et al.* 2004.
- 223 *Tristychius*: Dick 1978; Coates & Gess 2007; Coates & Tietjen 2018; Coates *et al.* 2019.
- 224 *Uraniacanthus*: Bernacsek & Dineley 1977; Hanke & Davis 2008; Newman *et al.* 2012; Burrow *et al.*  
225 2016.
- 226 *Youngolepis*: Chang & Yu 1981; Chang 1982, 1991, 2004.
- 227

## 228 Characters

### 229 *Skeletal tissues*

- 230 **1. Tessellate calcified cartilage: absent (0); present (1).** Dean & Summers (2006); Dean *et al.*  
231 (2009); Maisey (1984, 2001, 2013); Seidel *et al.* (2016) Lund & Grogan (1997, 2004a, b);  
232 Coates & Sequeira (2001a, b); Brazeau (2009); Davis *et al.* (2012); Grogan *et al.* (2012);  
233 Pradel *et al.* (2014).
- 234 **2. Perichondral bone: present (0); absent (1).** Janvier (1996); Donoghue & Aldridge (2001);  
235 Brazeau (2009); Davis *et al.* (2012).
- 236 **3. Extensive endochondral ossification: absent (0); present (1).** Forey (1980); Gardiner  
237 (1984); Brazeau (2009); Davis *et al.* (2012).
- 238 **4. Extensive calcified cartilage: absent (0); present (1).** To capture all taxa in which the  
239 neurocranium, jaws, hyoid and gill arches, as well as parts of the axial and appendicular  
240 skeleton are mineralized in the absence of perichondral bone.
- 241 **5. Tubular dentine: absent (0); present (1).** Stahl (1999), see also Patterson (1965): present in  
242 chimaeroids, edestids, *Helodus*, and petalodonts, but absent in symmoriids and iniopterygians  
243 (Zangerl & Case 1973).
- 244 **6. Pore canal network: absent (0); present (1).** Lu *et al.* (2016).
- 245 **7. Acrodin tooth caps (enameloid cap restricted to crown apex): absent (0); present (1).**  
246 Friedman & Brazeau (2010); Zhu *et al.* (2013, 2009); Lu *et al.* (2016).

247

### 248 *Squamation & related structures*

- 249 **8. Trunk scales monocuspid (0); multicuspid (1).** Revised after Davis *et al.* (2012); see  
250 Burrow *et al.* (2016) and Coates *et al.* (2018).
- 251 **9. Scale growth concentric: absent (0); present (1).** Hanke & Wilson (2004); Brazeau (2009);  
252 Davis *et al.* (2012); Burrow *et al.* (2016).
- 253 **10. Peg-and-socket articulation: absent (0); present (1).** Gardiner (1984); Coates (1999);  
254 Brazeau (2009); Davis *et al.* (2012).
- 255 **11. Anterodorsal process on scale: absent (0); present (1).** Zhu *et al.* (2009, 2013); Gardiner  
256 (1984); Coates (1999); Brazeau (2009); Davis *et al.* (2012). Notably present in *Cheirolepis*,  
257 see Pearson and Westoll (1979).
- 258 **12. Body scales with bulging base: absent (0); present (1).** Brazeau (2009); Davis *et al.* (2012);  
259 Burrow *et al.* (2016).
- 260 **13. Body scales with flattened base: absent (0); present (1).** Brazeau (2009); Davis *et al.*  
261 (2012); Burrow *et al.* (2016). Note that both flat- and bulge-based scales occur in conjunction  
262 in *Ptomacanthus* (Brazeau 2012).
- 263 **14. Body scales with basal canal or open basal vascular cavity: absent (0); present (1).**  
264 Chondrichthyan placoid scales are distinguished, in part, by the presence of a basal canal (Reif  
265 1978). Early chondrichthyan scales that depart from the standard placoid morphology also  
266 exhibit basal canals, e.g. *Akmonistion* (Coates & Sequeira 2001a, fig. 12E) and *Antarctilamna*  
267 (Young 1982, p.830). Basal canals are present in putative chondrichthyan scale forms such as  
268 *Elegestolepis* (Karatajūte-Talimaa 1992), *Polymerolepis* and *Seretolepis* (Hanke & Wilson  
269 2010).

- 270 **15. Neck canal: absent (0) present (1).** Although a standard feature of placoid scales, presence of  
271 a neck canal is widespread among early vertebrates: Coates *et al.* (2018).
- 272 **16. Cranial sensory line canal passes between or beneath scales (0); passes over scales and/or**  
273 **is partially enclosed or surrounded by scales (1); perforates and passes through scales**  
274 **(2).** Character revised after Dearden *et al.* (2019).
- 275 **17. Postcranial sensory line canal passes between or beneath scales (0); passes over scales**  
276 **and/or is partially enclosed or surrounded by scales (1); perforates and passes through**  
277 **scales (2).** Character revised after Dearden *et al.* (2019).
- 278 **18. Lepidotrichia: absent (0); present (1).**
- 279 **19. Fringing fulcra: absent (0); present (1).** Zhu *et al.* (2009; 2013); Coates (1999). Scored  
280 inapplicable in taxa lacking lepidotrichia.
- 281 **20. Scute-like ridge scales (fulcra): absent (0); present (1).** Giles *et al.* (2015c).
- 282

283 *Cranial dermal skeleton*

- 284 **21. Cranial cap denticles, single-crowned, non-growing: absent (0); present (1).** Scored absent  
285 in *Ferromirum*; if present, it appears likely that they would have been preserved.
- 286 **22. Sclerotic ring: absent (0); present (1).** Giles *et al.* (2015, c.52), Qiao *et al.* (2016, c.277),  
287 Zhu *et al.* (2016, c.275); Burrow *et al.* (2016); Coates *et al.* (2018).
- 288 **23. Number of sclerotic plates: four or less (0); more than four (1).** Zhu *et al.* (2013, c170);  
289 Qiao *et al.* (2016, c.241); Zhu *et al.* (2016, c.239); Burrow *et al.* (2016).
- 290 **24. Dermal skull roof includes large dermal plates (0); consists of plates, tesseræ or scales**  
291 **(1); naked or largely scale free (2).** Forey (1980); Gardiner (1984); Brazeau (2009); Davis *et*  
292 *al.* (2012); Zhu *et al.* (2013); Brazeau & Friedman (2014).
- 293 **25. Dermal ornamentation: smooth (0); parallel, vermiform ridges (1); concentric ridges (2);**  
294 **tuberculate (3).** Giles *et al.* (2015c). Coded inapplicable where dermal plates absent.
- 295 **26. Cranial tessera morphology: large interlocking plates (0); microsquamose, no larger**  
296 **than body squamation (1).** Brazeau (2009) through to Giles *et al.* (2015c). Coded  
297 inapplicable where tesseræ are absent.
- 298 **27. Anterior or mesial edge of nasal notched for anterior nostril: absent (0); present (1).**  
299 Contra Zhu *et al.* (2013), the anterior rim of the nasal in *Cheirolepis* is notched.
- 300 **28. Supraorbital: absent (0); present (1).** Zhu *et al.* (2009, 2013).
- 301 **29. Broad supraorbital vaults: absent (0); present (1).** Dennis & Miles (1981); Giles *et al.*  
302 (2015c). As noted by Giles *et al.*, this character is contingent on the presence of a dermal skull  
303 roof composed of large dermal bones.
- 304 **30. Large median bone contributes to posterior margin of skull roof: absent (0); present (1).**  
305 Zhu *et al.* (2016).
- 306 **31. Pineal opening perforates dermal skull roof: present (0); absent (1).** Davis *et al.* (2012);  
307 Giles *et al.* (2015c).
- 308 **32. Consolidated cheek plates: absent (0); present (1).** Davis (2002); Brazeau (2009); Davis *et*  
309 *al.* (2012); Zhu *et al.* (2013); Burrow *et al.* (2016).
- 310 **33. Enlarged postorbital tessera separate from orbital series: absent (0); present (1).** Brazeau  
311 (2009); Davis *et al.* (2012); Zhu *et al.* (2013); Burrow *et al.* (2016).
- 312 **34. Dermal intracranial joint: absent (0); present (1).** Zhu *et al.* (2009, 2013).



- 313 35. **Sensory line network preserved as open grooves (sulci) in dermal bones (0); sensory lines**  
314 **pass through canals enclosed within dermal bones (1).** (Davis 2002); Davis *et al.* (2012);  
315 Zhu *et al.* (2013).
- 316 36. **Sensory canal or pit-line associated with maxilla: absent (0); present (1).** Contra Zhu *et al.*  
317 (2013) this structure is not reported or figured in *Mimipiscis* (Gardiner 1984, Choo 2011);  
318 Friedman (2007) notes correctly that this feature is present in onychodonts, *Moythomasia* and  
319 *Cheirolepis*.
- 320 37. **Jugal portion of infraorbital canal joins supramaxillary canal: present (0); absent (1).**  
321 Brazeau (2009), but see redefinition in Davis *et al.* (2012); Zhu *et al.* (2013).
- 322 38. **Anterior pit line of skull roof: absent (0); present (1).** Giles *et al.* (2015c).
- 323 39. **Spiracular opening in dermal skull roof bounded by bones carrying otic canal: absent**  
324 **(0); present (1).** Giles *et al.* (2015); Lu *et al.* (2016).
- 325 40. **Dermohyal (submarginal) ossification: absent (0); present (1).** Alternative homology  
326 hypotheses discussed in Coates *et al.* (2018).
- 327 41. **Branchiostegal series: absent (0); present (1).** Davis (2002); Hanke & Wilson (2004);  
328 Brazeau (2009); Davis *et al.* (2012); Zhu *et al.* (2013); Burrow *et al.* (2016).
- 329 42. **Opercular and subopercular bones: absent (0); present (1).** Scores for opercular bones  
330 contingent on branchiostegal series presence.
- 331 43. **Branchiostegal plate series along ventral margin of lower jaw: absent (0); present (1).**  
332 Davis (2002); Hanke & Wilson (2004); Brazeau (2009); Davis *et al.* (2012); Zhu *et al.* (2013).
- 333 44. **Branchiostegal ossifications plate-like (0); narrow and ribbon-like (1); filamentous (2).**  
334 Hanke & Wilson (2004); Brazeau (2009); Davis *et al.* (2012); Lu *et al.* (2016).
- 335 45. **Branchiostegal ossifications ornamented (0); unornamented (1).** Brazeau (2009); Davis *et al.*  
336 (2012); Zhu *et al.* (2013).
- 337 46. **Branchiostegals imbricated: absent (0); present (1).** Brazeau (2009); Davis *et al.* (2012);  
338 Zhu *et al.* (2013).
- 339 47. **Opercular cover of branchial chamber complete or partial (0); separate gill covers and**  
340 **gill slits (1).** Scores revised after Dearden *et al.* (2019), Watson (1937) and reference to  
341 specimen NHMUK P49979. Although *Acanthodes* has an elongate pharynx, with the gill  
342 skeleton arranged postcranially much as in a modern elasmobranch, it appears that an  
343 extended opercular flap was present. As noted by Watson (1937, p.110), a vertical portion of a  
344 scale-enclosed opercular sensory canal passes vertically, uninterrupted, across the more  
345 posterior members of the gill arch series. The canal must have been flap-supported. Close  
346 examination of NHMUK P49979 confirms this feature.
- 347 48. **Gular plates: absent (0); present (1).** Gardiner (1984); Brazeau (2009); Davis *et al.* (2012);  
348 Zhu *et al.* (2013).

349

350 *Hyoid and gill arches*

- 351 49. **Gill skeleton mostly beneath otico-occipital region (0); mostly posterior to occipital**  
352 **region (1).** Zangerl (1981); Lund & Grogan (1997); Stahl (1999). Both conditions (states '0'  
353 and '1') are likely present among acanthodians; scores have been revised to be consistent with  
354 Dearden *et al.* (2019).
- 355 50. **First branchial arch meets neurocranium ventral to otic region (0); posterior to otic**  
356 **region (1).** Included after Dearden *et al.* (2019), but scores differ. In *Acanthodes* NHMUK  
357 specimens P34914, P49979, and P49990, the first branchial arch is positioned posterior to the  
358 hyoid arch. The head of the anteriormost branchial arch is post-otic, and not nested within or

- 359 below the hyoid arch, as reconstructed by Dearden *et al.* (2019, Fig. 3). Dearden *et al.* score  
360 *Cladoselache* and *Cobelodus* as state '0'; here, the scores are revised to state '1'.
- 361 **51. Perforate hyomandibula: absent (0); present (1).** Zhu *et al.* (2009, 2013); Lu *et al.* (2016).
- 362 **52. Interhyal: absent (0); present (1).** Davis *et al.* (2012); Zhu *et al.* (2013).
- 363 **53. Ceratohyal with posterior/proximal external fossa: absent (0); present (1).** Posteriorly, the  
364 ceratohyal curves, to a greater or lesser extent, both dorsally and laterally. The lateral surface  
365 encloses a hollow: a distinct, broad fossa. Fossil examples include *Tristychius* (Coates *et al.*  
366 2019) *Egertonodus* (Maisey, 1983), *Orthacanthus* (Hotton, 1952; pers. obs. M.I.C.),  
367 *Gogoselachus* (Long *et al.* 2015), *Cladoselache* (Maisey 1989), and as shown here,  
368 *Ferromirum*. Further examples are evident in the partly crushed ceratohyals in specimens of  
369 *Akmonistion* (Coates & Sequeira 2001), and the similarly preserved ceratohyal of *Gladbachus*  
370 (Coates *et al.* 2018, supplementary fig. 7b).
- 371 **54. Ceratohyal with broad posteroventral flange or shelf, projecting laterally into recess in  
372 Meckel's cartilage: absent (0); present (1).** Present in *Ferromirum*, this flange is likely also  
373 present in *Cladoselache*, identified as a 'ventral process' (Maisey 1989). In *Ferromirum*, the  
374 flange fits snugly into a smooth recess within the posteroventral extremity of the medial  
375 surface of Meckel's cartilage. Such a flange is also clearly present in *Cobelodus aculeatus* PF  
376 7351 (not figured, but listed in Zangerl & Case 1976 as nearly whole, articulated skeleton,  
377 lacking tail), and is likely present in many symmoriids. Like that of *Ferromirum*, the flange  
378 engages with a ventrolateral recess in the posterior of Meckel's cartilage (personal  
379 observation, MIC). See also *Debeerius* (Grogan & Lund 2000, fig. C,D,E): a similarly broad  
380 flange is present, although the specimen is flattened.
- 381 **55. Ceratohyal spatulate or bladed anteriorly: absent (0); present (1).** Present in *Tristychius*  
382 and *Phoebodus*. Alternative characterisation: in general, main shaft of the ceratohyal is  
383 laterally compressed and/or slender. The apomorphic condition is to have a dorsoventrally  
384 flattened and anteriorly expanded shaft. *Ferromirum* exhibits the laterally compressed,  
385 elongate condition.
- 386 **56. Hypohyals: absent (0); present (1).** Friedman & Brazeau (2010); Pradel *et al.* (2014); scores  
387 updated after Dearden *et al.* (2019). Notably, the reconstructed arrangement in *Triodus*  
388 (Heidtke *et al.* 2004) showing large hypohyals is consistent with details in photograph of the  
389 type specimen of *T. sessilis* (Hampe, 2004, Fig. 18). However, such hypohyals appear absent  
390 in *Orthacanthus* (Heidtke 1999, Abb.5), a less derived member of the xenacanth clade  
391 (Hampe, 2004). Presence in *Ferromirum* is consistent with conditions *Ozarcus*, *Cobelodus*,  
392 and *Akmonistion*.
- 393 **57. Basihyal: absent, hyoid arch articulates directly with basibranchial (0); present (1).**  
394 Pradel *et al.* (2014); Carr *et al.* (2009); Brazeau *et al.* (2017); Dearden *et al.* (2019) in part.  
395 Acknowledging the discussion in Dearden *et al.*, here the definition of a basihyal is the  
396 unpaired, median unit of the hyoid arch, separated from other basibranchials, and in some taxa  
397 also articulating with the first branchial arch. Thus, a basihyal is distinguished from the  
398 elongate single basibranchial of early osteichthyans. A T-shaped basihyal is present in  
399 *Acanthodes* (Watson 1937; Heidtke 2011), resembling the similarly formed basihyal in  
400 *Orthacanthus* (Heidtke 1999).
- 401 **58. Separate supra- and infra-pharyngobranchials absent (0); present (1).** Gardiner (1984);  
402 Pradel *et al.* (2014). Scored as uncertain for *Ferromirum*.
- 403 **59. Pharyngobranchials directed anteriorly (0); posteriorly (1).** Pradel *et al.* (2014). Scored as  
404 uncertain for *Ferromirum*.
- 405 **60. Posteriormost branchial arch bears epibranchial unit: absent (0); present (1).** Scored as  
406 uncertain for *Ferromirum*.
- 407 **61. Epibranchials bear posterior flange: absent (0); present (1).**

- 408 **62. Hypobranchials directed anteriorly (0); hypobranchials of second and more posterior**  
 409 **gill arches directed posteriorly (1).**
- 410 **63. Multiple unpaired basibranchial mineralisations absent (0); present (1).** Included after  
 411 Dearden *et al.* (2019), but scores differ. Among the hybodontids, *Hamiltonichthys* is scored  
 412 present; conditions in other hybodontids are unknown. The xenacanth *Triodus* is scored absent  
 413 rather than present (Heidtke *et al.*, 2004, identify a series of paired hypobranchials as  
 414 basibranchials; revision here consistent with Dearden *et al.* 2019 Fig. 4h), but *Orthacanthus* is  
 415 scored present rather than unknown.
- 416 **64. Elongate posterior copula projects posteriorly, beyond rearmost branchial arch: absent**  
 417 **(0); present (1).** Present in many early chondrichthyans, including *Ferromirum*, *Guttarensis*,  
 418 *Debeerius*, and *Gladbachus*; also manifest in modern chimaeroids and elasmobranchs. Thus,  
 419 this possibly constitutes an autapomorphy at some level of the chondrichthyan clade. Notably  
 420 absent in *Tristychius* and xenacanths.

421

422 *Dentition & tooth-bearing bones*

- 423 **65. Oral dermal tubercles borne on jaw cartilages: absent (0); present (1).** Hanke & Wilson  
 424 (2004); Brazeau (2009); Davis *et al.* (2012); Zhu *et al.* (2013). This character is concerned only  
 425 with position and form, and not with histological, and by inference, developmental  
 426 distinctiveness (cf. Rücklin *et al.* 2012).
- 427 **66. Pharyngeal teeth or denticles: absent (0); present (1).**
- 428 **67. Tooth families/generative tooth sets: absent (0); present (1).** Davis (2002); Hanke &  
 429 Wilson (2004); Brazeau (2009); Davis *et al.* (2012); Zhu *et al.* (2013).
- 430 **68. Tooth families/generative sets restricted to symphyseal region (0); distributed along jaw**  
 431 **margin (1).** Hanke & Wilson (2004); Brazeau (2009); Davis *et al.* (2012); Zhu *et al.* (2013).  
 432 Revised in light of discussion by Tucker and Fraser (2013): tooth whorl restricted to  
 433 symphyseal region appears to be the more general condition, whereas tooth whorls distributed  
 434 continuously along the gape margin likely represents a chondrichthyan synapomorphy.
- 435 **69. Number of generative tooth sets per jaw ramus: 15 or fewer (0); 20 or more (1).**
- 436 **70. Bases of tooth families/generative sets: single, continuous plate (0); some or all whorls**  
 437 **consist of separate tooth units (1).** Adjusted from Brazeau (2009); Davis *et al.* (2012); Zhu  
 438 *et al.* (2013); Giles *et al.* (2015).
- 439 **71. Lingual torus: absent (0); present (1).** This platform or ledge (Ginter *et al.* 2010) is notably  
 440 absent in early elasmobranchs and many of the non-toothplate dentitions of stem  
 441 holocephalans.
- 442 **72. Basolabial shelf: absent (0); present (1).** (Ginter *et al.* 2010.)
- 443 **73. Teeth with three slim main cusps almost equal to each other, strongly recurved: absent**  
 444 **(0); present (1).** Adapted from Ginter *et al.* (2010).
- 445 **74. Toothplates absent (0); present (1).** Patterson (1965); Stahl (1999).
- 446 **75. Toothplates consolidated into one to three large posterior plates, and one to three**  
 447 **smaller anterior tooth plates, occupying each quadrant of the jaw: absent (0); present**  
 448 **(1).** Adapted from Stahl (1999), the character captures conditions in chondrenchelyids,  
 449 cochliodonts, and more derived taxa.
- 450 **76. Toothplate complement restricted to two pairs in the upper jaw and a single pair in the**  
 451 **lower jaw: absent (0); present (1).** After Patterson (1965).
- 452 **77. Mandibular teeth fused to dermal plates on biting surfaces of jaw cartilages: absent (0);**  
 453 **present (1).** Hanke & Wilson (2004); Brazeau (2009); Davis *et al.* (2012); Zhu *et al.* (2013).

- 454 **78. Dermal plates on biting surface of jaw cartilages: absent (0); present (1).** Brazeau (2009);  
455 Davis *et al.* (2012); Zhu *et al.* (2013); Giles *et al.* (2015c).
- 456 **79. Gnathal plates mesial to and/or above (or below) jaw cartilage: absent (0); present (1).**  
457 Zhu *et al.* (2016).
- 458 **80. Maxilla and premaxilla *sensu stricto* (upper gnathal plates lateral to jaw cartilage  
459 without palatal lamina): absent (0); present (1).** [Zhu *et al.* (2016).
- 460 **81. Dentary bone encloses mandibular sensory canal: absent (0); present (1).** Gardiner  
461 (1984); see also Zhu *et al.* (2009, 2013).
- 462 **82. Infradentary foramen and groove, series: absent (0); present (1).** Zhu *et al.* (2010): note  
463 discussion of the lower jaw attributed, to *Meemannia*.
- 464 **83. Tooth-bearing median rostral: absent (0); present (1).** Zhu *et al.* (2009, 2013).
- 465 **84. Median dermal bone of palate (parasphenoid): absent (0); present (1).** Gardiner (1984);  
466 Brazeau (2009); Davis *et al.* (2012); Zhu *et al.* (2013).
- 467 **85. Denticulated field of parasphenoid: without spiracular groove (0); with spiracular  
468 groove (1).** Friedman (2007); Zhu *et al.* (2009, 2013).
- 469 **86. Denticle field of parasphenoid with multifid anterior margin: absent (0); present (1).**  
470 Friedman (2007); Zhu *et al.* (2009, 2013); Lu *et al.* (2016).
- 471

472 *Mandibular arch*

- 473 **87. Large otic process of the palatoquadrate: absent (0); present (1).** Coates & Sequeira  
474 (2001a); Davis (2002); Brazeau (2009); Zhu *et al.* (2009, 2013).
- 475 **88. Oblique ridge or groove along medial face of palatoquadrate: absent (0); present (1).**  
476 Brazeau (2009); Davis *et al.* (2012); Zhu *et al.* (2013); Lu *et al.* (2016). Likely more  
477 widespread than previously thought: in *Ferromirum* the ridge matches the position of that in  
478 *Acanthodes*, although the cross-sectional profile is more rounded. Unable to score in *Ozarcus*  
479 because the more dorsal portion of the otic process is absent.
- 480 **89. Fenestration of palatoquadrate at basiptyergoid articulation: absent (0); present (1).**  
481 Brazeau (2009); Davis *et al.* (2012); Zhu *et al.* (2013); Lu *et al.* (2016).
- 482 **90. Perforate or fenestrate anterodorsal (metapterygoid) portion of palatoquadrate: absent  
483 (0); present (1).** Davis (2002); Brazeau (2009); Davis *et al.* (2012); Zhu *et al.* (2013).
- 484 **91. Articulation surface of the palatoquadrate with the postorbital process directed  
485 anteriorly (0); laterally (1); dorsally (2).**
- 486 **92. Palatoquadrate fused to the neurocranium: absent (0); present (1).**
- 487 **93. Pronounced dorsal process on Meckelian bone or cartilage: absent (0); present (1).**  
488 Hanke & Wilson (2004); Brazeau (2009); Davis *et al.* (2012); Zhu *et al.* (2013); Burrow *et al.*  
489 (2016).
- 490 **94. Mandibular knob or mesial process: absent (0); present (1).** Brazeau (2009); Davis *et al.*  
491 (2012); Zhu *et al.* (2013); Burrow *et al.* (2016).
- 492 **95. Jaw articulation located on rearmost extremity of mandible: absent (0); present (1).**  
493 Davis *et al.* (2012); Zhu *et al.* (2013).
- 494 **96. Meckel's cartilage with flange or shelf projecting posteriorly from the lateral cotylus  
495 (glenoid): absent (0); present (1).** *Tristychius* (Coates *et al.* 2019) and *Gogoselachus* (Long  
496 *et al.* 2015, figs 1C and 2A, G) exhibit the same derived condition in which this retroarticular  
497 flange is an uninterrupted, smooth extension of the lateral wall of the mandible.

- 498 **97. Dental trough adjacent to oral rim on Meckel's cartilage and palatoquadrate: absent (0);**  
499 **present (1).**
- 500 **98. Dental trough divided, scalloped tooth-bearing margin on Meckel's cartilage and**  
501 **palatoquadrate: absent (0); present (1).**
- 502 **99. Mandibular symphysis fused: absent (0); present (1).**  
503
- 504 *Neurocranium*
- 505 **100. Internasal vacuities: absent (0); present (1).** Lu *et al.* (2016).
- 506 **101. Precerebral fontanelle: absent or minimal (0); present and large (1).** Schaeffer (1981);  
507 Lund & Grogan (1997); Coates & Sequeira (1998, 2001a, b); Maisey (2001a); Brazeau  
508 (2009); Pradel *et al.* (2011) Davis *et al.* (2012); Zhu *et al.* (2013); Brazeau & Friedman  
509 (2014).
- 510 **102. Space for forebrain and (at least) proximal portion of olfactory tracts narrow and**  
511 **elongate, extending between orbits: absent (0); present (1).**
- 512 **103. Rostral bar: absent (0); present (1).** Maisey (1985).
- 513 **104. Internasal groove absent (0); present (1).**
- 514 **105. Orbitonasal lamina expanded: absent (0); present (1).** Patterson (1965).
- 515 **106. Elongate, tooth-bearing, pre-nasal ethmo-rostral region: absent (0); present (1).**
- 516 **107. Palatobasal (or orbital) articulation posterior to the optic foramen (0); anterior to the**  
517 **optic foramen, grooved, and overlapped by process or flange of palatoquadrate (1);**  
518 **anterior to optic foramen, smooth, and overlaps or flanks articular surface on**  
519 **palatoquadrate (2).** Pradel *et al.* (2011); Coates *et al.* (2017); Maisey (2005).
- 520 **108. Trochlear nerve foramen anterior to optic nerve foramen: absent (0); present (1).**
- 521 **109. Supraorbital shelf broad with convex lateral margin: absent (0); present (1).** Brazeau  
522 (2009); Davis *et al.* (2012); Zhu *et al.* (2013).
- 523 **110. Interorbital space broad (0); narrow (1).** Brazeau (2009); Davis *et al.* (2012); Zhu *et al.*  
524 (2013); Coates *et al.* (2017).<sup>1</sup>
- 525 **111. Optic pedicel: absent (0); present (1).** Dupret (2014); Zhu *et al.* (2009, 2013); Coates *et al.*  
526 (2017).
- 527 **112. Large prootic foramen separated from optic fenestra by antotic pillar bearing optic**  
528 **pedicel: absent (0); present (1).** Adapted from Maisey *et al.* (2019); likely synapomorphy of  
529 pucapampellids.
- 530 **113. Ophthalmic foramen in anterodorsal extremity of orbit communicates with enclosed**  
531 **cranial space: absent (0); present (1).**
- 532 **114. Extended prehypophysial portion of sphenoid: absent (0); present (1).** Brazeau (2009);  
533 Davis *et al.* (2012); Zhu *et al.* (2013).
- 534 **115. Canal for efferent pseudobranchial artery within basicranial cartilage: absent (0);**  
535 **present (1).** Brazeau (2009); Davis *et al.* (2012); Zhu *et al.* (2013).
- 536 **116. Entrance of internal carotids: through separate openings flanking the hypophyseal**  
537 **opening or recess (0); through a common opening at the central midline of the**  
538 **basicranium (1).** Schaeffer (1981); Coates & Sequeira (1998); Brazeau (2009); Davis *et al.*  
539 (2012); Zhu *et al.* (2013).

- 540 **117. Internal carotids: entering single or paired openings in the basicranium from a**  
541 **posterolateral angle (0); entering basicranial opening(s) head-on from an extreme,**  
542 **lateral angle (1); absent (2).**
- 543 **118. Ascending basisphenoid pillar pierced by common internal carotid: absent (0); present**  
544 **(1).** Miles (1973b); Brazeau (2009); Friedman & Brazeau (2010); Davis *et al.* (2012); Zhu *et*  
545 *al.* (2013).
- 546 **119. Spiracular groove on basicranial surface: absent (0); present (1).** Davis *et al.* (2012); Zhu  
547 *et al.* (2013).
- 548 **120. Spiracular groove on lateral or transverse wall of jugular canal: absent (0); present (1).**  
549 Davis *et al.* (2012); Zhu *et al.* (2013).
- 550 **121. Spiracular groove open (0); enclosed by spiracular bar or canal (1).** Lu *et al.* (2016);  
551 (Patterson 1982).
- 552 **122. Orbit larger than otic capsule: absent (0); present (1).** Lund & Grogan (1997); Coates *et al.*  
553 (2017).
- 554 **123. Postorbital process and arcade: absent (0); present (1).** Pradel *et al.* (2011).
- 555 **124. Postorbital process and arcade short and deep - width not more than maximum**  
556 **braincase width (excluding arcade) (0); process and arcade wide - width exceeds**  
557 **maximum width of braincase, and anteroposteriorly narrow (1); process and arcade**  
558 **massive (2); arcade forms postorbital pillar (3).**
- 559 **125. Postorbital process downturned, with anedral angle relative to basicranium: absent (0);**  
560 **present (1).** (Maisey 2011).
- 561 **126. Jugular canal diameter small (0); large (1); canal absent (2).** Pradel *et al.* (2011).
- 562 **127. Canal, likely for trigeminal nerve (V) mandibular ramus, passes through the postorbital**  
563 **process from proximal dorsal entry to distal and ventral exit: absent (0); present (1).**
- 564 **128. Postorbital process expanded anteroposteriorly: absent (0); present (1).**
- 565 **129. Postorbital process articulates with palatoquadrate: absent (0); present (1).** Schaeffer  
566 (1981); Coates & Sequeira (1998); Maisey (2001a); Pradel *et al.* (2011); Davis *et al.* (2012);  
567 Zhu *et al.* (2013).
- 568 **130. Trigemino-facial recess: absent (0); present (1).** Goodrich (1930); Gardiner (1984); Pradel  
569 (2010); Pradel *et al.* (2011); Davis *et al.* (2012).
- 570 **131. Jugular canal long, extends throughout most of otic capsule wall posterior to the**  
571 **postorbital process (0); short and/or groove present on exterior of otic wall (1); absent,**  
572 **path of jugular removed from otic wall (2).** Brazeau (2009); Davis *et al.* (2012); Zhu *et al.*  
573 (2013); Giles *et al.* (2015c); Coates *et al.* (2017).
- 574 **132. C-bout notch separates postorbital process from supraotic shelf: absent (0); present (1).**
- 575 **133. Hyoid ramus of facial nerve (N. VII) exits through posterior jugular opening: absent (0);**  
576 **present (1).** Friedman (2007); Brazeau (2009); Friedman & Brazeau (2010); Davis *et al.*  
577 (2012); Zhu *et al.* (2013).
- 578 **134. Periotic process: absent (0); present (1).** Maisey (2007); Coates *et al.* (2017).
- 579 **135. Relative position of jugular groove and hyomandibular articulation: hyomandibula**  
580 **dorsal or same level (i.e. on bridge) (0); jugular vein passing dorsal or lateral to**  
581 **hyomandibula (1).** Brazeau & de Winter (2015).
- 582 **136. Transverse otic process: absent (0); present (1).** Lu *et al.* (2016); Giles *et al.* (2016); Giles  
583 *et al.* (2015).
- 584 **137. Craniospinal process: absent (0); present (1).** Giles *et al.* (2015); Lu *et al.* (2016).

- 585 **138. Lateral otic process: absent (0); present (1).** Schaeffer (1981); Coates & Sequeira (1998);  
586 Brazeau (2009); Davis *et al.* (2012); Zhu *et al.* (2013). Although identified present in  
587 *Guttarensis* (Sequeira & Coates 2000, Text-Fig. 3), this is not the prominent lateral otic  
588 process of *Xenacanth*s or *Tamiobatis*.
- 589 **139. Hyomandibula articulates with neurocranium beneath otic shelf: absent (0); present (1).**
- 590 **140. Sub-otic occipital fossa: absent (0); present (1).**
- 591 **141. Postotic process: absent (0); present (1)** Pradel *et al.* (2011).
- 592 **142. Otic capsule extends posterolaterally relative to occipital arch: absent (0); present (1)**  
593 Maisey (1985).
- 594 **143. Otic capsules: widely separated (0); approaching dorsal midline (1).**
- 595 **144. Otic capsules project anteriorly between postorbital processes: absent (0); present (1)**  
596 (Maisey 1983).
- 597 **145. Endocranial roof anterior to otic capsules domelike, smoothly convex dorsally and**  
598 **anteriorly: absent (0); present (1).**
- 599 **146. Roof of skeletal cavity for cerebellum and mesencephalon significantly higher than**  
600 **dorsal-most level of semicircular canals: absent (0); present (1).**
- 601 **147. Roof of the endocranial space for telencephalon and olfactory tracts offset ventrally**  
602 **relative to level of mesencephalon: absent (0); present (1).** Coates *et al.* (2017).
- 603 **148. Labyrinth cavity separated from the main neurocranial cavity by a cartilaginous or**  
604 **ossified capsular wall (0); skeletal medial capsular wall absent (1).** Pradel *et al.* (2011);  
605 Davis *et al.* (2012); Zhu *et al.* (2013).
- 606 **149. Double octaval nerve foramina in chondrified mesial wall of otic capsule: absent (0);**  
607 **present (1).**
- 608 **150. External (horizontal) semicircular canal joins the vestibular region dorsal to posterior**  
609 **ampulla (0); joins level with posterior ampulla (1).** Davis *et al.* (2012); Zhu *et al.* (2013).
- 610 **151. Angle of external semicircular canal: in lateral view, straight line projected through**  
611 **canal intersects anterior ampulla, external ampullae, and base of foramen magnum:**  
612 **absent (0); present (1)** Maisey (2007).
- 613 **152. Left and right external semicircular canals approach or meet the posterodorsal midline**  
614 **of the hindbrain roof: absent (0); present (1).**
- 615 **153. Preampullary portion of posterior semicircular canal absent (0); present (1).**
- 616 **154. Crus commune connecting anterior and posterior semicircular canals: present (0);**  
617 **absent (1).**
- 618 **155. Sinus superior: absent or indistinguishable from union of anterior and posterior canals**  
619 **with saccular chamber (0); present, elongate and nearly vertical (1).** Davis *et al.* (2012);  
620 Zhu *et al.* (2013).
- 621 **156. Lateral cranial canal: absent (0); present (1).** Zhu *et al.* (2009, 2013); Lu *et al.* (2016).  
622 Gardiner (1984); Coates (1998).
- 623 **157. Endolymphatic ducts: posteriodorsally angled tubes (0); tubes oriented vertically**  
624 **through endolymphatic fossa/posterior dorsal fontanelle (1).** Schaeffer (1981); Coates &  
625 Sequeira (1998, 2001); Davis (2002); Brazeau (2009); Davis *et al.* (2012); Zhu *et al.* (2013).
- 626 **158. Posterior dorsal fontanelle connected to persistent otico-occipital fissure (0); posterior**  
627 **tectum separates fontanelle from fissure (1).** Schaeffer (1981); Coates & Sequeira (1998);  
628 Pradel *et al.* (2011).
- 629 **159. Subcircular endolymphatic foramen: absent (0); present (1).** Pradel *et al.* (2015); Maisey  
630 & Lane (2010).

- 631 **160. External opening for endolymphatic ducts anterior to crus commune: absent (0); present**  
632 **(1).** Coates *et al.* (2017).
- 633 **161. Supraotic shelf broad: absent (0); present (1).**
- 634 **162. Dorsal otic ridge: absent (0); present (1).** Coates & Sequeira (1998, 2001); Maisey (2001);  
635 Davis (2002); Davis *et al.* (2012); Zhu *et al.* (2013); Brazeau & Friedman (2014). As  
636 discussed by Brazeau and Friedman, the utility of this likely chondrichthyan synapomorphy is  
637 challenged by the difficulty of coding for presence in taxa with firmly attached dermatocranial  
638 bones.
- 639 **163. Dorsal otic ridge forms a crest posteriorly: absent (0); present (1).** Coates & Sequeira  
640 (1998, 2001); Pradel *et al.* (2011).
- 641 **164. Endolymphatic fossa: absent (0); present (1).** Pradel *et al.* (2011). The endolymphatic fossa  
642 identified in *Guttarensis* (Sequeira & Coates 2000, Text-Fig. 3) is likely an eroded surface  
643 revealing the dorsally ascending endolymphatic ducts.
- 644 **165. Endolymphatic fossa elongate (slot-shaped), dividing dorsal otic ridge along midline:**  
645 **absent (0); present (1).** Coates *et al.* (2017).
- 646 **166. Perilymphatic fenestra within the endolymphatic fossa: absent (0); present (1).** Pradel *et al.*  
647 (2011); Coates *et al.* (2017).
- 648 **167. Ventral cranial fissure: absent (0); present (1).** Janvier (1996); Coates & Sequeira (2001);  
649 Maisey (2001); Davis (2002); Brazeau (2009); Pradel *et al.* (2011); Davis *et al.* (2012); Zhu *et al.*  
650 (2013).
- 651 **168. Endoskeletal intracranial joint: absent (0); present (1).** Janvier (1996, and references  
652 therein); Davis *et al.* (2012); Zhu *et al.* (2013).
- 653 **169. Metotic (otic-occipital) fissure: absent (0); present (1).** Schaeffer (1981); Janvier (1996);  
654 Coates & Sequeira (1998); Maisey (2001); Davis (2002); Brazeau (2009); Pradel *et al.* (2011);  
655 Davis *et al.* (2012); Zhu *et al.* (2013).
- 656 **170. Vestibular fontanelle: absent (0); present (1).** Brazeau (2009); Friedman & Brazeau (2010).  
657 Davis *et al.* (2012); Zhu *et al.* (2013).
- 658 **171. Hypotic lamina: absent (0); present (1).** Schaeffer (1981); Maisey (1984, 2001); Brazeau  
659 (2009); Pradel *et al.* (2011, 2013); Davis *et al.* (2012); Zhu *et al.* (2013). Note recent  
660 discussions in Coates *et al.* (2017) and Maisey *et al.* (2019).
- 661 **172. Glossopharyngeal nerve path: directed laterally, across floor of the saccular chamber**  
662 **and exits via foramen in side wall of the otic capsule (0); directed posteriorly, and exits**  
663 **through metotic fissure or foramen in posteroventral wall of otic capsule (1); exits**  
664 **laterally through a canal contained ventrally (floored) by the hypotic lamina (2); exits**  
665 **through a foramen anterior to the posterior ampulla (3).** Coates *et al.* (2017), adapted from  
666 Schaeffer (1981); Coates & Sequeira (1998, 2001); Brazeau (2009); Davis *et al.* (2012); Zhu  
667 *et al.* (2013); Pradel *et al.* (2011, 2013).
- 668 **173. Glossopharyngeal and vagus nerves share common exit from neurocranium: absent (0);**  
669 **present (1).**
- 670 **174. Basicranial morphology: platybasic (0); tropibasic (1).** Brazeau (2009); Pradel *et al.*  
671 (2011); Davis *et al.* (2012); Zhu *et al.* (2013); Maisey (2007); Pradel *et al.* (2011).
- 672 **175. Channel for dorsal aorta and/or lateral dorsal aortae passes through basicranium (0);**  
673 **external to basicranium (1).** Schaeffer (1981); Coates & Sequeira (1998); Brazeau (2009);  
674 Pradel *et al.* (2011); Brazeau & Friedman (2014); Coates *et al.* (2017).
- 675 **176. Dorsal aorta divides into lateral dorsal aortae posterior to occipital level (0); anterior to**  
676 **level of the occiput (1).** Pradel *et al.* (2011); Giles *et al.* (2015); Coates *et al.* (2017).



- 677 **177. Posterior openings of lateral aortic canals positioned lateral to occipital cotylus: absent**  
678 **(0); present (1).** Adapted from Maisey et al. (2019); likely synapomorphy of pucapampellids.
- 679 **178. Ventral portion of occipital arch wedged between rear of otic capsules: absent (0);**  
680 **present (1).** Schaeffer (1981); Coates & Sequeira (1998); Maisey (2001a); Brazeau (2009);  
681 Pradel *et al.* (2011); Davis *et al.* (2012); Coates *et al.* (2017).
- 682 **179. Dorsal portion of occipital arch wedged between otic capsules: absent (0); present (1).**  
683 Schaeffer (1981); Coates & Sequeira (1998); Maisey (2001a); Brazeau (2009); Pradel *et al.*  
684 (2011); Davis *et al.* (2012); Coates *et al.* (2017).
- 685 **180. Occipital crest anteroposteriorly elongate, and extends from the roof of the posterior**  
686 **tectum: absent (0); present (1).**
- 687

688 *Axial and appendicular skeleton*

- 689 **181. Calcified vertebral centra: absent (0); present (1).** Maisey (1985): biconcave calcified disc  
690 centra surrounding constricted notochord, suggested synapomorphy of crown elasmobranchs  
691 (Coates *et al.* 2017).
- 692 **182. Chordacentra: absent (0); present (1).** Stahl (1999); Coates and Sequeira (2001); Coates *et*  
693 *al.* (2017).
- 694 **183. Chordacentra polyspondylous and consist of narrow closely packed rings: absent (0);**  
695 **present (1).** Patterson (1965); Coates *et al.* (2017).
- 696 **184. Synarcual: absent (0); present (1).** Stahl (1999); Brazeau (2009); Davis *et al.* (2012); Zhu *et*  
697 *al.* (2013); Coates *et al.* (2017).
- 698 **185. Macromeric dermal pectoral girdle (0); micromeric or lacking dermal skeleton entirely**  
699 **(1).** Brazeau (2009); Davis *et al.* (2012); Zhu *et al.* (2013).
- 700 **186. Macromeric dermal pectoral girdle composition: ventral and dorsal components (0);**  
701 **ventral components only (1).** Brazeau (2009); Davis *et al.* (2012); Zhu *et al.* (2013).
- 702 **187. Macromeric pectoral dermal skeleton forms complete ring around the trunk: present**  
703 **(0); absent (1).** Goujet & Young (2004); Brazeau (2009); Davis *et al.* (2012); Zhu *et al.*  
704 (2013).
- 705 **188. Median dorsal plate: absent (0); present (1).** Brazeau (2009); Davis *et al.* (2012); Zhu *et al.*  
706 (2013).
- 707 **189. Scapular process (dorsal) of shoulder endoskeleton: absent (0); present (1).** Coates &  
708 Sequeira (2001a); Zhu & Schultze (2001); Davis (2002); Brazeau (2009); Davis *et al.* (2012);  
709 Zhu *et al.* (2013); Brazeau & Friedman (2014).
- 710 **190. Ventral margin of separate scapular ossification: horizontal (0); deeply angled (1).** Hanke  
711 & Wilson (2004); Brazeau (2009); Davis *et al.* (2012); Zhu *et al.* (2013).
- 712 **191. Cross sectional shape of scapular process: flattened or strongly ovate (0); subcircular (1).**  
713 Davis (2002); Brazeau (2009); Davis *et al.* (2012); Zhu *et al.* (2013); Burrow *et al.* (2016).
- 714 **192. Flange on trailing edge of scapulocoracoid: absent (0); present (1).** Davis (2002); Brazeau  
715 (2009); Davis *et al.* (2012); Zhu *et al.* (2013); Burrow *et al.* (2016).
- 716 **193. Scapular process with posterodorsal process. Absent (0); present (1).** Coates & Sequeira  
717 (2001a); Davis *et al.* (2012); Zhu *et al.* (2013).
- 718 **194. Mineralisation of internal surface of scapular process: mineralised all around (0); un-**  
719 **mineralised on internal face forming a hemicylindrical cross-section.** Brazeau (2009);  
720 Davis *et al.* (2012); Zhu *et al.* (2013); Burrow *et al.* (2016).

- 721 **195. Coracoid process: absent (0); present (1).** Brazeau (2009); Davis *et al.* (2012); Zhu *et al.*  
722 (2013).
- 723 **196. Procoracoid mineralisation: absent (0); present (1).** Davis (2002); Hanke & Wilson (2004);  
724 Brazeau (2009).
- 725 **197. Fin base articulation on scapulocoracoid: stenobasal, deeper than wide (0); eurybasal,**  
726 **wider than deep (1).** Lu *et al.* (2016).
- 727 **198. Pectoral fin articulation monobasal (0); dibasal (1); three or more basals (2).**
- 728 **199. Metapterygium pectinate subtriangular plate or bar supporting numerous (six or more)**  
729 **radials along distal edge: absent (0); present (1).**
- 730 **200. Metapterygial whip absent (0); present (1).** Coates *et al.* (2017).
- 731 **201. Biserial pectoral fin endoskeleton: absent (0); present (1).** Lu *et al.* (2016).
- 732 **202. Propterygium perforated: absent (0); present (1).** Rosen *et al.* (1981); Patterson (1982);  
733 Davis *et al.* (2012); Zhu *et al.* (2013).
- 734 **203. Pelvic girdle with fused puboischiadic bar: absent (0); present (1).** Maisey (1984); Coates  
735 & Sequeira (2001a); Coates *et al.* (2017).
- 736 **204. Mixipterygial/mixopterygial claspers: absent (0), present (1).** Brazeau & Friedman (2014);  
737 Coates & Sequeira (2001a,b); Compagno (1999); Liem & Summers (1999); Long *et al.*  
738 (2015); Trinajstić *et al.* (2014).
- 739 **205. Pre-pelvic clasper or tenaculum: absent (0); present (1).** Patterson (1965); Coates *et al.*  
740 (2017).
- 741 **206. Number of dorsal fins, if present: one (0); two (1); one, extending from pectoral to anal**  
742 **fin level (2).** Coates & Sequeira (2001a); Brazeau (2009); Davis *et al.* (2012); Zhu *et al.*  
743 (2013).
- 744 **207. Brush complex of bilaterally distributed calcified tubes flanking or embedded in**  
745 **calcified cartilage core: absent (0); present (1).**
- 746 **208. Posterior or pelvic-level dorsal fin with calcified base plate: absent (0); present (1).**  
747 Coates & Sequeira (2001a, b).
- 748 **209. Posterior dorsal fin with delta-shaped cartilage: absent (0); present (1).** Coates &  
749 Sequeira (2001a, b).
- 750 **210. Posterior or pelvic-level dorsal fin shape, base approximately as broad as tall and not**  
751 **broader than other median fins (0); base much longer than fin height, substantially**  
752 **longer than other median fins (1).** Brazeau & deWinter (2015); Lu *et al.* (2017).
- 753 **211. Anal fin: absent (0); present (1).** Coates & Sequeira (2001); Brazeau (2009); Davis *et al.*  
754 (2012); Zhu *et al.* (2013).
- 755 **212. Anal fin base narrow, posteriormost proximal segments radials broad: absent (0);**  
756 **present (1).**
- 757 **213. Caudal radials restricted to axial lobe (0); extend beyond level of body wall and deep**  
758 **into hypochordal lobe (1).** Davis *et al.* (2012); Zhu *et al.* (2013).
- 759 **214. Caudal neural and/or supraneural spines or radials short (0); long, expanded, and**  
760 **supporting high aspect-ratio (lunate) tail with notochord extending to posterodorsal**  
761 **extremity (1); notochord terminates pre-caudal extremity, neural and heamal radial**  
762 **lengths near symmetrical and support epichordal and hypochordal lobes respectively (2).**
- 763
- 764

- 766 **215. Dorsal fin spine or spines: absent (0); present (1).** Zhu *et al.* (2001); Zhu & Yu (2002);  
 767 Friedman (2007); Brazeau (2009); Davis *et al.* (2012); Zhu *et al.* (2013); Lu *et al.* (2016).
- 768 **216. Dorsal fin spine at anterior (pectoral level) location only: absent (0); present (1).**
- 769 **217. Dorsal fin spine cross section: horseshoe shaped (0); flat sided with rectangular profile**  
 770 **(1); subcircular (2).** Hampe (2002); Brazeau & de Winter (2015).
- 771 **218. Dorsal fin spine apex curved posteriorly: absent (0); present (1).** Present in *Ferromirum*  
 772 and *Cladosepiche*.
- 773 **219. Anterior dorsal fin spine leading edge concave in lateral view: absent (0); present (1).**
- 774 **220. Anal fin spine: absent (0); present (1).** Maisey (1986); Davis (2002); Brazeau (2009).
- 775 **221. Pectoral fin spines: absent (0); present (1).** Davis (2002); Brazeau (2009); Davis *et al.*  
 776 (2012); Zhu *et al.* (2013).
- 777 **222. Pectoral fin spine with denticles along posterior surface: absent (0); present (1).** Burrow  
 778 *et al.* (2016).
- 779 **223. Prepectoral fin spines: absent (0); present (1).** Davis (2002); Hanke & Wilson (2004);  
 780 Brazeau (2009); Davis *et al.* (2012); Zhu *et al.* (2013). Present in *Doliodus* (Maisey *et al.*  
 781 2017); see also Dearden *et al.* (2019).
- 782 **224. Admedian pectoral spines absent (0); present (1).** Burrow *et al.* (2016).
- 783 **225. Median fin spine insertion: shallow, not greatly deeper than dermal bones/ scales (0);**  
 784 **deep (1).** Davis (2002); Hanke & Wilson (2004); Brazeau (2009). Davis *et al.* (2012); Zhu *et al.*  
 785 (2013).
- 786 **226. Intermediate (pre-pelvic) fin spines: absent (0); present (1).** Davis (2002); Hanke &  
 787 Wilson (2004); Brazeau (2009); Davis *et al.* (2012); Zhu *et al.* (2013).
- 788 **227. Fin spines with ridges: absent (0); present (1).** Davis (2002); Brazeau (2009); Davis *et al.*  
 789 (2012); Zhu *et al.* (2013).
- 790 **228. Fin spines with nodes: absent (0); present (1).** Davis (2002); Hanke & Wilson (2004);  
 791 Brazeau (2009). Davis *et al.* (2012); Zhu *et al.* (2013).
- 792 **229. Fin spines (dorsal) with rows of large denticles: absent (0); on posterior surface (1); on**  
 793 **lateral surface (2).** Maisey (1989b); Davis *et al.* (2012); Zhu *et al.* (2013); Brazeau &  
 794 Friedman (2014).
- 795 **230. Cephalic spines: absent (0); present (1).** Maisey (1989); Coates *et al.* (2017).
- 796

797 **Synapomorphy lists (deltran optimisation)**

798 Asterisk indicates synapomorphy with CI 1.0.

799

800 Total group Chondrichthyes

801 32 Absence of cheek plates

802 40 Absence of dermohyal

803 43 Absence of branchiostegal series

804 48\* Absence of gular plates

805 67 Generative tooth sets

806 72 Generative tooth sets distributed along jaw margin

807 78 Absence of dermal plates along biting margin

808 189\* Scapular process

809 228 Prepelvic (intermediate) fin spines

810

811 Acanthodian rump group

812

813 Conventional Chondrichthyes?

814

815 Crown group Chondrichthyes

816

817 Total group Holocephali

818

819 Ferromirum and Guttarensis

820

821 Total group Elasmobranchii

822 **Supplementary References**

- 823 Adrain, J. M., & Wilson, M. V. H. Early Devonian cephalaspids (Vertebrata: Osteostraci: Cornuata)  
824 from the southern Mackenzie Mountains. *J. Vertebr. Paleontol.* **14**, 301–319 (1994).
- 825 Andrews, S. M., & Westoll, T. S. The postcranial skeleton of *Eusthenopteron foordi* Whiteaves.  
826 *Trans. R. Soc. Edinb.* **68**, 207-329 (1970).
- 827 Andrews, S. M., Long, J. A., Ahlberg, P. E., Barwick, R. E. & Campbell, K. S. W. The structure of the  
828 sarcopterygian *Onychodus jandemarrri n. sp.* From Gogo, Western Australia: with a functional  
829 interpretation of the skeleton. *Trans. R. Soc. Edinb. Earth Sci.* **96**, 197–307 (2006).
- 830 Arratia, G. & Cloutier, R. in *Devonian Fishes and Plants of Miguasha, Quebec, Canada* (eds.  
831 Schultze, H.-P. & Cloutier, R.) 165-197 (Verlag Dr. Friedrich Pfeil, Munich, 1996).
- 832 Basden, A. M. & Young, G. C. A primitive actinopterygian neurocranium from the Early Devonian of  
833 Southeastern Australia. *J. Vertebr. Paleontol.* **21**, 754-766 (2001).
- 834 Basden, A. M., Young, G. C., Coates, M. I. & Ritchie, A. The most primitive osteichthyan braincase?  
835 *Nature* **403**, 185–188 (2000).
- 836 Bernacsek, G.M., & Dineley, D.L. New acanthodians from the Delorme Formation (Lower Devonian)  
837 of N.W.T., Canada. *Paleontographica Abt.A* **158**, 1-25 (1977).
- 838 Bendix-Almgreen, S. E. The paired fins and shoulder girdle in *Cladoseleche*, their morphology and  
839 phyletic significance. *Colloques Internationaux du Centre National de la Recherche*  
840 *Scientifique* **218**, 111-123 (1975).
- 841 Beznosov, P. A redescription of the Early Carboniferous acanthodian *Acanthodes lopatini* Rohon,  
842 1889. *Acta Zoologica* **90** (supplement 1), 183-193 (2009).
- 843 Botella, H., Blom, H., Dorka, M., Ahlberg, P. E. & Janvier, P. Jaws and teeth of the earliest bony  
844 fishes. *Nature* **448**, 583-586 (2007).
- 845 Brazeau, M. D. The braincase and jaws of a Devonian ‘acanthodian’ and modern gnathostome origins.  
846 *Nature* **457**, 305-308 (2009).
- 847 Brazeau, M. D. A revision of the anatomy of the early Devonian jawed vertebrate *Ptomacanthus*  
848 *anglicus* Miles. *Palaeontology* **55**, 355-367 (2012).
- 849 Brazeau, M. D. & Friedman, M. The characters of Palaeozoic jawed vertebrates. *Zoological Journal of*  
850 *the Linnean Society*, **170**, 779-821 (2014).
- 851 Brazeau, M. D. & de Winter, V. The hyoid arch and braincase anatomy of *Acanthodes* support  
852 chondrichthyan affinity of ‘acanthodians’. *Proc. R. Soc. B* **282**: 20152210 (2015).
- 853 Brazeau, M. D., Friedman, M., Jerve, A., & Atwood, R. C. A three-dimensional placoderm (stem-  
854 group gnathostome) pharyngeal skeleton and its implications for primitive gnathostome  
855 pharyngeal architecture. *Journal of Morphology*. DOI: 10.1002/jmor.20706 (2017).
- 856 Bremer, K. The limits of amino-acid sequence data in angiosperm phylogenetic reconstruction.  
857 *Evolution* **42**, 795-803 (1988).
- 858 Burrow, C. J. A new lophosteiform (Osteichthyes) from the Lower Devonian of Australia. *Geobios M.*  
859 *S.* **19**, 327-333 (1995).
- 860 Burrow, C. J. A partial articulated acanthodian from the Silurian of New Brunswick, Canada. *Can. J.*  
861 *Earth Sci* **48**, 1329-1341 (2011).
- 862 Burrow, C. J., den Blaauwen, J., Newman, M. & Davidson, R. The diplacanthid fishes (Acanthodii,  
863 Diplacanthiformes, Diplacanthidae) from the Middle Devonian of Scotland. *Palaeontologica*  
864 *Electronica* **19**, 1-83 (2016).
- 865 Burrow, C. J., Newman, M. J., Davidson, R. G., & den Blaauwen, J. L. Sclerotic plates or

- 866 circumorbital bones in early jawed fishes? *Palaeontology* **54**, 207- 214 (2011).
- 867 Burrow, C. J. & Rudkin, D. Oldest near-complete acanthodian: the first vertebrate from the Silurian  
868 Bertie formation konservat-Lagerstätte, Ontario. *PLoS ONE* **9**(8),  
869 DOI:10.1371/journal.pone.0104171 (2014).
- 870 Burrow, C. J., Trinajstić, K. & Long, J. First acanthodian from the Upper Devonian (Frasnian) Gogo  
871 Formation, Western Australia. *Historical Biology* **24**, DOI:10.1080/08912963.2012.660150  
872 (2012).
- 873 Burrow, C. J. & Turner, S. Devonian placoderm scales from Australia. *Journal of Vertebrate*  
874 *Paleontology* **18**, 677-695 (1998).
- 875 Burrow, C. J. & Turner, S. A review of placoderm scales, and their significance in placoderm  
876 phylogeny. *Journal of Vertebrate Paleontology* **19**, 204-219 (1999).
- 877 Burrow, C.J., & Turner, S. Reassessment of “*Protodus*” *scoticus* from the Early Devonian of Scotland.  
878 In *Morphology, Phylogeny and Paleobiogeography of Fossil Fishes*. (eds Elliot, D.K., Maisey,  
879 J.G., Yu, X. & Miao, D.) 123–144 (Freidrich Pfeil, 2010).
- 880 Burrow, C. J. & Turner, S. Scale structure of the putative chondrichthyan *Gladbachus adentatus*  
881 Heidtke & Krätschmer, 2001 from the Middle Devonian Rheinisches Schiefergebirge,  
882 Germany. *Historical Biology* **25**, 385-390 (2013).
- 883 Burrow, C. J., Turner, S. & Heidtke, U. H. J. The squamation of *Gladbachus adentatus* Heidtke &  
884 Kratschmer, 2001. *UNESCO-IUGCP 491: The Gross Symposium 2 Advances in*  
885 *Palaeoichthyology, Riga, Latvia, September 7-14, 2003*, p 16-17 (2003).
- 886 Carr, R. K., Johanson, Z. & Ritchie, A. The phyllolepid placoderm *Cowralepis mclachlani*: insights  
887 into the evolution of feeding mechanisms in jawed vertebrates. *J. Morph* **270**, 775-804 (2009).
- 888 Chang, M. M. *The braincase of Youngolepis, a Lower Devonian crossopterygian from Yunnan, south-*  
889 *western China*. Doctoral dissertation, Department of Geology, Stockholm University (1982).
- 890 Chang, M.-M. Head exoskeleton and shoulder girdle of *Youngolepis*. In *Early Vertebrates and*  
891 *Related Problems of Evolutionary Biology*, M.-M. Chang, Y.-H. Liu and G.-R. Zhang, eds.  
892 (Beijing: Science Press), pp. 355–378 (1991).
- 893 Chang, M.-M. Synapomorphies and scenarios - more characters of *Youngolepis* betraying its affinity  
894 to the Dipnoi. In *Recent Advances in the Origin and Early Radiation of Vertebrates*, G. Arratia,  
895 M. V. H. Wilson and R. Cloutier, eds. (München: Verlag Dr. Friedrich Pfeil), pp. 665–686  
896 (2004).
- 897 Chang, M.-M. & Yu, X.-B. A new crossopterygian, *Youngolepis praecursor*, gen. et sp. nov., from  
898 Lower Devonian of E. Yunnan, China. *Sci. Sin.* **24**, 89–97 (1981).
- 899 Chang, M.-M. & Yu, X.-B. Reexamination of the relationship of Middle Devonian osteolepids - fossil  
900 characters and their interpretations. *American Museum Novitates* **3189**, 1-20 (1997).
- 901 Chang, M.-M. & Zhu, M. A new Middle Devonian osteolepidid from Qujing, Yunnan. *Memoirs of the*  
902 *Association of Australasian Palaeontologists* **15**, 183-198 (1993).
- 903 Choo, B. Revision of the actinopterygian genus *Mimipiscis* (= *Mimia*) from the Upper Devonian Gogo  
904 Formation of Western Australia and the interrelationships of early Actinopterygii. *Earth and*  
905 *Environmental Science Transactions of the Royal Society of Edinburgh*, **102**: 77-104 (2011)
- 906 Clement, G. Nouvelles données anatomiques et morphologie générale des “Porolepididae”  
907 (Dipnomorpha, Sarcopterygii). *Revue de Paléobiologie, Genève* **Volume spéciale 9**, 193-211  
908 (2004).
- 909 Cloutier, R., & Ahlberg, P. E. in *Interrelationships of Fishes* (eds Stiassny, M. L. J., Parenti, L. R., &  
910 Johnson, G. D.) 445–479. (Academic, 1996).
- 911 Coates, M. I. The origin of vertebrate limbs. *Development Supplement*, 169-180 (1994).

- 912 Coates, M. I. Actinopterygians from the Namurian of Bearsden, Scotland, with comments on the early  
913 evolution of actinopterygian neurocrania. *Zool. J. Linn. Soc.* **122**, 27-59. (1998).
- 914 Coates, M. *Gladbachus adentatus* Heidtke & Kratschmer; is it a chondrichthyan, and if so, where does  
915 it fit in phylogeny? *Paleobios* **25**, 31-32 (2005).
- 916 Coates, M. I., Finarelli, J. A., Sansom, I. J., Andreev, P. S., Criswell, K. E., Tietjen, K., Rivers, M. L.,  
917 & La Riviere, P. J. An early chondrichthyan and the evolutionary assembly of a shark body  
918 plan. *Proc. R. Soc. B.* 20172418 (2018).
- 919 Coates, M. I. & Friedman, M. in *Morphology, Phylogeny and Paleobiogeography of Fossil Fishes*.  
920 (eds Elliot, D.K., Maisey, J.G., Yu, X. & Miao, D.) 389–416 (Freidrich Pfeil, 2010).
- 921 Coates, M. I. & Gess, R. W. A new reconstruction of *Onychoselache Traquairi*, comments on early  
922 chondrichthyan pectoral girdles and hybodontiform phylogeny. *Palaeontology* **50**, 1421-1446  
923 (2007).
- 924 Coates, M. I., Gess, R. W., Finarelli, J. A., Criswell, K. E. & Tietjen, K. A symmoriiform  
925 chondrichthyan braincase and the origin of chimaeroid fishes. *Nature* **541**, 209-211 (2017).
- 926 Coates, M. I., Sansom, I. J. & Smith, M. M. Spines and tissues of ancient sharks. *Nature* **396**, 729-730  
927 (1998).
- 928 Coates, M. I. & Sequeira, S. E. K. The braincase of a primitive shark. *Trans. R. Soc. Edinb. (Earth  
929 Sci.)* **89**, 63–85 (1998).
- 930 Coates, M. I. & Sequeira, S. E. K. A new stethacanthid chondrichthyan from the Lower Carboniferous  
931 of Bearsden, Scotland. *J. Vertebr. Paleontol.* **21**, 754–766 (2001a).
- 932 Coates, M. I. & Sequeira, S. E. K. in *Major Events in Early Vertebrate Evolution* (ed. Ahlberg, P. E.)  
933 241–262 (Taylor and Francis, 2001b).
- 934 Coates, M. I. & Tietjen, K. The neurocranium of the Lower Carboniferous shark *Tristychius arcuatus*  
935 (Agassiz, 1837). *Earth and Environmental Science Transactions of the Royal Society of  
936 Edinburgh* (in press).
- 937 Coates, M. I., Tietjen, K., Olsen, A. M. & Finarelli, J. A. High-performance suction feeding in an early  
938 elasmobranch. *Sci. Adv.* **5**, eaax2742 (2019).
- 939 Coates, M. I., Tietjen, K., Johanson, Z., Friedman, M., Sang, S. The cranium of *Helodus simplex*  
940 (Agassiz, 1838) revised. In: John Maisey symposium, Ichthyol explanation freshwaters (eds.  
941 Denton, J., Pradel, A. & Janvier, P.). (Verlag Pfeil Forthcoming 2020).
- 942 Cole, F. J. On the cranial nerves of *Chimaera monstrosa* (Linn.); with a discussion of the lateral line  
943 system and of the morphology of the chorda tympani. *Trans. R. Soc. Edinb.* **38**, 631-680 (1896).
- 944 Compagno, L. J. V. in *Sharks, Skates, and Rays, the Biology of Elasmobranch Fishes* (ed. Hamlett, W.  
945 C.) 69-92 (Johns Hopkins University, 1999).
- 946 Creanza, N., Schwarz, J. S. & Cohen, J. E. Intraseasonal Dynamics and Dominant Sequences in H3N2  
947 Influenza. *PLoS ONE* **5**, (2010), doi: 10.1371/journal.pone.0008544
- 948 Daniel, J. F. *The Elasmobranch Fishes* (Univ. California Press, Berkeley, 1922).
- 949 Davis, J. C. *Statistics and Data Analysis in Geology* (Wiley, New York, 1986).
- 950 Davis, S. P. Comparative anatomy and relationships of the acanthodian fishes. *Unpublished PhD  
951 thesis, Univ. London*, 1–318. (2002).
- 952 Davis, S. P., Finarelli, J. A., & Coates, M. I. *Acanthodes* and shark-like conditions in the last common  
953 ancestor of modern gnathostomes. *Nature* **486**, 247-250 (2012).
- 954 DeBeer, G. R. *The Development of the Vertebrate Skull* (Univ. Chicago, 1937).
- 955 De Beer, G. R. & Moy-Thomas, J. A. On the skull of Holocephali. *Philos. Trans. R. Soc. London B.  
956 Biol. Sci.* **224**: 287-312 (1935).

- 957 Dean, M. N. & Summers, A. P. Cartilage in the skeleton of cartilaginous fishes. *Zoology* **109**,164–168  
958 (2006).
- 959 Dean, M. N., Mull, C. G., Gorb, S. N. & Summers, A. P. Ontogeny of the tessellated skeleton: insight  
960 form the skeletal growth of the round stingray *Urobatis halleri*. *J. Anat.* DOI:10.1111/j.1469-  
961 7580.2009.01116x (2009).
- 962 Dearden, R. P., Stockey C. & Brazeau, M.D. The pharynx of the stem-chondrichthyan *Ptomacanthus*  
963 and the early evolution of the gnathostome gill skeleton. *Nature Communications*, **10**, 2050.  
964 doi.org/10.1038/s41467-019-10032-3 (2019).
- 965 Denison, R. in *Handbook of Paleoichthyology* Vol. 2 (ed. Schultze, H.-P.) (Gustav Fischer Verlag,  
966 Stuttgart, 1978).
- 967 Denison, R. in *Handbook of Paleoichthyology* Vol. 5 (ed. Schultze, H.-P.) (Gustav Fischer Verlag,  
968 Stuttgart, 1979).
- 969 Dennis, K. D. & Miles, R. S. A pachyosteomorph arthrodire from Gogo, Western Australia.  
970 *Zoological Journal of the Linnean Society* **73**, 213-258 (1981).
- 971 Dick, J. R. R. On the Carboniferous shark *Tristychius arcuatus* Agassiz from Scotland. *Trans. R. Soc.*  
972 *Edinb.* **70**, 63–109 (1978).
- 973 Dick, J. R. R. *Diplodoselache woodi* gen. et sp. nov., an early Carboniferous shark from the Midland  
974 Valley of Scotland. *Trans. R. Soc. Edinb.* **72**, 99–113 (1981).
- 975 Dick, J. R. F. & Maisey, J. G. The Scottish Lower Carboniferous shark *Onychoselache traquairi*.  
976 *Palaeontology* **23**, 363-374 (1980).
- 977 Didier, D. A. Phylogenetic systematics of extant chimaeroid fishes (Holocephali, Chimaeroidei). *Am.*  
978 *Mus. Novit.* **3119**, 1–86 (1995).
- 979 Didier, D. A., Kemper, J. M. & Ebert, D. A. in *Biology of Sharks and Their Relatives* (eds Carrier, J.  
980 C., Musick, J. & Heithaus, M. R.) 97-122 (CRC Press, 2012).
- 981 Didier, D. A., Stahl, B. J. & Zangerl R. Development and growth of compound tooth plates in  
982 *Callorhynchus milii* (Chondrichthyes, Holocephali). *Journal of Morphology* **222**, 73-89 (1994).
- 983 Donoghue, P.C.J., & Aldridge, R. J. in *Major events in early vertebrate evolution: palaeontology,*  
984 *phylogeny, genetics and development.* (ed Ahlberg, P. E.) 85–105 (Taylor & Francis, 2001).
- 985 Donoghue, P. C. J., Forey, P. L., & Aldridge, R. J. Conodont affinity and chordate phylogeny. *Biol.*  
986 *Rev.* **75**, 191–251 (2000).
- 987 Downs, J. P. & Donoghue, P. C. J. Skeletal histology of *Bothriolepis canadensis* (Placodermi,  
988 Antiarchi) and evolution of the skeleton at the origin of jawed vertebrates. *Journal of*  
989 *Morphology* **270**, 1364-1380 (2009).
- 990 Dupret, V., Sanchez, S., Goujet, D., Tafforeau, P. & Ahlberg, P. E. A primitive placoderm sheds light  
991 on the origin of the jawed vertebrate face. *Nature* **507**, 500-503 (2014).
- 992 Dupret, V., Sanchez, S., Goujet, D. & Ahlberg, P. E. The internal cranial anatomy of *Romundina*  
993 *stellina* Orvig, 1975 (Vertebrata, Placodermi, Acanthothoraci) and the origin of jawed  
994 vertebrates-Anatomical atlas of a primitive gnathostomes. *PLoS ONE* **12**: e0171241.  
995 DOI:10.1371/journal.pone.0171241 (2017).
- 996 Eriksson, T., *AutoDecay Version 5.0.* (2001).
- 997 Felsenstein, J. Confidence-limits on phylogenies - an approach using the bootstrap. *Evolution* **39**, 783-  
998 791 (1985).
- 999 Finarelli, J. A. & Coates, M. I. First tooth-set outside the jaws in a vertebrate. *Proceedings of the*  
1000 *Royal Society of London Series B-Biological Sciences* **279**, 775-779 (2012).



- 1001 Finarelli, J. A. & Coates, M. I. *Chondrenchelys problematica* (Traquair, 1888) redescribed: a Lower  
1002 Carboniferous, eel-like holocephalan from Scotland. *Earth and Environmental Science*  
1003 *Transactions of the Royal Society of Edinburgh* **105**, 1-25 (2014).
- 1004 Fletcher, T., Altringham J., Peakall, J., Wignall, P., & Dorrell, R. Hydrodynamics of fossil fishes.  
1005 *Proc. R. Soc. B* **281**, 20140703 (2014).
- 1006 Forey, P. L. *Latimeria*: a paradoxical fish. *Proc. R. Soc. London, Ser. B* **208**, 369–384 (1980).
- 1007 Frey, L., Coates, M., Ginter, M., Hairapetian, V., Rücklin, M., Jerjen, I., & Klug, C. The early  
1008 elasmobranch *Phoebodus*: phylogenetic relationships, ecomorphology and a new time-scale for  
1009 shark evolution. *Proc. R. Soc. B* **286**: 20191336 (2019).
- 1010 Friedman, M. *Styloichthys* as the oldest coelacanth: implications for early osteichthyan  
1011 interrelationships. *J. Syst. Palaeontol.* **5**, 289–343 (2007).
- 1012 Friedman, M. & Brazeau, M. A reappraisal of the origin and basal radiation of the Osteichthyes. *J.*  
1013 *Vertebr. Paleontol.* **30**, 36–56 (2010).
- 1014 Gagnier, P. Y. in *Devonian Fishes and Plants of Miguasha, Quebec, Canada*. (eds Schultze, H. P. &  
1015 Cloutier, R.) 149–163 (Friedrich Pfeil, 1996).
- 1016 Gagnier, P.-Y., Hanke, G. F. & Wilson, M. V. H. *Tetanopsyrus lindoei* gen. et sp. nov., an Early  
1017 Devonian acanthodian from the Northwest Territories, Canada. *Acta Geologica Polonica* **49**,  
1018 81-96 (1999).
- 1019 Gagnier, P.-Y. & Wilson, M. V. H. New evidences on jaw bones and jaw articulations in  
1020 acanthodians. *Geobios* **19** (1995).
- 1021 Gagnier, P.-Y. & Wilson, M. V. H. Early Devonian acanthodians from northern Canada.  
1022 *Palaeontology* **39**, 241–258 (1996a).
- 1023 Gagnier P. –Y. & Wilson M. V. H. An unusual acanthodian from Northern Canada: revision of  
1024 *Brochoadmones milesi*. *Modern Geology* **20**, 235-251 (1996b).
- 1025 Gai Z., Donoghue, P. C. J., Zhu, M., Janvier, P. & Stampanoni, M. Fossil jawless fish from China  
1026 foreshadows early jawed vertebrate anatomy. *Nature* **476**, 324-367 (2011).
- 1027 Gans, C. & Parsons, T. S. *A Photographic Atlas of Shark Anatomy* (Academic Press, New York,  
1028 1964).
- 1029 Gardiner, B. G. The relationships of the palaeoniscoid fishes, a review based on new specimens of  
1030 *Mimia* and *Moythomasia* from the Upper Devonian of Western Australia. *Bull. Br. Mus. Nat.*  
1031 *Hist. (Geol.)* **37**, 173–428 (1984).
- 1032 Gardiner B. G. & Bartram A. W. H. in *Problems in Vertebrate Evolution* (eds Andrews, S. M., Miles,  
1033 R. S., Walker & A. D.) 227-245 (Linnean Symposium Series, London, 1977).
- 1034 Gess R. W. & Coates M. I. High-latitude chondrichthyans from the Late Devonian (Famennian)  
1035 Witpoort formation of South Africa. *Paläontol Z* DOI:10.1007/s12542-014-0221-9 (2014).
- 1036 Giles, S., Coates, M., Garwood, R. J., Brazeau, M. D., Atwood, R., Johanson, Z. & Friedman, M.  
1037 Endoskeletal structure in *Cherolepis* (Osteichthyes, Actinopterygii), an early ray-finned fish.  
1038 *Palaeontology* 2015, DOI:10.1111/pala. 12182 (2015a).
- 1039 Giles, S., Darras, L., Clément, G., Blicck, A. & Friedman, M. An exceptionally preserved Late  
1040 Devonian actinopterygian provides a new model for primitive cranial anatomy in ray-finned  
1041 fishes. *Proc. R. Soc. B* **282**: 20151485 (2015b).
- 1042 Giles, S., Friedman, M. & Brazeau, M. D. Osteichthyan-like cranial conditions in an Early Devonian  
1043 stem gnathostome. *Nature* **520**, 82-85 (2015c).
- 1044 Goodrich E. S. *Studies on the structure and development of vertebrates* (Univ. Chicago Press, 1930).
- 1045 Goujet D, & Young G. C. in *Recent Advances in the Origin and Early Radiation of Vertebrates*, (eds  
1046 Arratia, G., Wilson, M. V. H. & Cloutier, R.) 109–26 (Friedrich Pfeil, 2004).

- 1047 Grogan, E. D. & Lund, R. *Debeerius ellefseni* (Fam. Nov., Gen. Nov., Sped. Nov.) an Autodiastyletic  
1048 Chondrichthyan From the Mississippian Bear Gulch Limestone of Montana (USA), the  
1049 Relationships of the Chondrichthyes, and Comments on Gnathostome Evolution. *J. Morphol.*  
1050 **243**, 219–245 (2000).
- 1051 Grogan, E. D., Lund, R. & Greenfest-Allen, E. in *Biology of Sharks and Their Relatives* (eds Carrier,  
1052 J. C., Musick, J. A. & Heithaus, M. R.) 3-29 (CRC Press, 2012).
- 1053 Gross, W. Histologischen Studien am Aussenskelett fossiler Agnathen und Fische. *Palaeontographica*  
1054 *Abteilung A* **83**, 1-60 (1935).
- 1055 Gross, W. Das Kopfskelett von *Cladodus wildungensis* Jaekel; 1. Teil. Endocranium und  
1056 Palatoquadratum. *Senckenbergiana* **19**, 80-107 (1937).
- 1057 Gross, W. Das Kopfskelett von *Cladodus wildungensis* Jaekel; 2. Teil. Der Kieferbogen. Anhang:  
1058 *Protractodus vetustus* Jaekel. *Senckenbergiana* **20**, 123-145 (1938).
- 1059 Gross, W. *Gemuendina stuerzi* Traquair. *Neuuntersuchung. Notizbl. Hess. Landesamt. Bodenf.* **91**, 36-  
1060 73. (1963).
- 1061 Gross, W. *Lophosteus superbus* Pander, ein Teleostome aus dem Silur Oesels. *Lethaia* **2**, 15-47  
1062 (1969).
- 1063 Gross, W. *Lophosteus superbus* Pander: Zähne, Zahnknochen und besondere Schuppenformen.  
1064 *Lethaia* **4**, 131-152 (1971).
- 1065 Gross, W. Kleinschuppen, Flossenstacheln und Zähne von Fischen aus europäischen und  
1066 nordamerikanischen Bonebeds des Devons. *Palaeontographica Abt A* **142**: 51–155 (1973)
- 1067 Hampe, O. Revision of the Xenacanthida (Chondrichthyes: Elasmobranchii) from the Carboniferous  
1068 of the British Isles. *Trans. R. Soc. Edinb. (Earth Sci.)* **93**, 191–237 (2003).
- 1069 Hanke G. F. *Promesacanthus eppleri* n. gen., n. sp., a mesacanthid (Acanthodii, Acanthodiformes)  
1070 from the Lower Devonian of northern Canada. *Geodiversitas* **30**, 287–302 (2008).
- 1071 Hanke, G. F. & Davis, S. P. Redescription of the acanthodian *Gladiobranthus probaton* Bernacsek &  
1072 Dineley, 1977, and comments on diplacanthid relationships. *Geodiversitas* **30**, 303-330 (2008).
- 1073 Hanke, G. F. & Davis, S. P. A re-examination of *Lupopsyrus pygmaeus* Bernacsek & Dineley, 1977  
1074 (Pisces, Acanthodii). *Geodiversitas* **34**, 469-487 (2012).
- 1075 Hanke, G. F., Davis, S. P. & Wilson, M. V. H. A new species of the acanthodian genus *Tetanopsyrus*  
1076 from Northern Canada, with comments on related taxa. *J. Vert. Paleontol.* **21**, 740-753 (2001).
- 1077 Hanke, G. F., & Wilson, M. V. H. in *Recent Advances in the Origin and Early Radiation of*  
1078 *Vertebrates*. (eds Arratia, G., Wilson, M. V. H., & Cloutier, R.) 189–216 (Freidrich Pfeil, 2004).
- 1079 Hanke, G. F. & Wilson, M. V. H. Anatomy of the Early Devonian Acanthodian *Brochoadmones milesi*  
1080 based on nearly complete body fossils, with comments on the evolution and development of  
1081 paired fins. *J. Vert. Paleontol.* **26**, 526-537 (2006).
- 1082 Hanke, G. F., & Wilson, M. V. H. in *Morphology, Phylogeny and Paleobiogeography of Fossil*  
1083 *Fishes*. (eds Elliot, D.K., Maisey, J.G., Yu, X. & Miao, D.) 159–182 (Freidrich Pfeil, 2010).
- 1084 Harris, J. E. The dorsal fin spine of *Cladoselache*. *Scientific Publications of the Cleveland Museum of*  
1085 *Natural History* **8**, 1-6 (1938a).
- 1086 Harris, J. E. The neurocranium and jaws of *Cladoselache*. *Scientific Publications of the Cleveland*  
1087 *Museum of Natural History* **8**, 7-12 (1938b).
- 1088 Heidtke, U. H. J. Der Xenacanthide *Orthacanthus senckenbergianus* aus dem pfälzischen  
1089 Rotliegenden (Unter-Perm). *Pollichia* **70**, 65-86 (1982).
- 1090 Heidtke, U. Studien über *Acanthodes*. 4. *Acanthodes boyi* n. sp., die dritte Art der Acanthodier  
1091 (Acanthodii: Pisces) aus dem Rotliegend (Unterperm) des Saar-Nahe-Beckens (S-W-  
1092 Deutschland. *Paläont. Z.* **67**, 331-341 (1993).

- 1093 Heidtke, U. H. J. *Orthacanthus (Lebachacanthus) senckenbergianus* Fritsch 1889 (Xenacanthida:  
1094 Chondrichthyes): revision, organisation und phylogenie. *Freiberger Forschungsheft* **481**, 63-  
1095 106 (1999).
- 1096 Heidtke, U. H. J. *Gladbachus adentatus*, die Geschichte des weltweit ältesten Hais – untersucht und  
1097 beschrieben aus dem AK Geowissenschaften. *Pollichia Kurrier* **25**, 24-26 (2009).
- 1098 Heidtke, U. H. J. Neue Erkenntnisse über *Acanthodes bronni* Agassiz 1833. *Mitt. Pollichia* **95**, 1-14  
1099 (2011a).
- 1100 Heidtke, U. H. J. Revision der unterpermischen Acanthodier (Acanthodii: Pisces) des  
1101 südwestdeutschen Saar-Nahe-Beckens. *Mitt. Pollichia* **95**, 15-41 (2011b).
- 1102 Heidtke, U. H. J. & Krätschmer K. *Gladbachus adentatus* nov. gen. et sp., ein primitiver Hai aus dem  
1103 Oberen Givetium (Oberes Mitteldevon) der Bergisch Gladbach – Paffrath-Mulde (Rheinisches  
1104 Schiefergebirge). *Mainzer geowiss. Mitt.* **30**, 105-122 (2001).
- 1105 Heidtke, U. H. J., Schwind, C. & Krätschmer K. Über die Organisation des Skelettes und die  
1106 verwandtschaftlichen Beziehungen der Gattung Triodus Jordan 1849 (Elasmobranchii:  
1107 Xenacanthida). *Mainzer geowiss. Mitt.* **32**, 9-54 (2004).
- 1108 Hemmings, S. K. A monograph of the Old Red Sandstone antiarchs of Scotland: *Pterichthyodes* and  
1109 *Microbrachius*. *Palaeontographical Society [Monographs]* **131**, 1-64 (1973).
- 1110 Holland, T. Pectoral girdle and fin anatomy of *Gogonauus andrewsae* Long, 1985: Implications for  
1111 tetrapodomorph limb evolution. *Journal of Morphology* **274**, 147-164 (2013).
- 1112 Holland, T. & Long, J. A. On the phylogenetic position of *Gogonauus andrewsae* Long 1985, within  
1113 the tetrapodomorpha. *Acta Zoologica* **90** (supplement 1), 285-296 (2009).
- 1114 Hotton, N. Jaws and teeth of American xenacanth sharks. *Journal of Paleontology* **26**, 489-500 (1952).
- 1115 Howard, L. E., Holmes, W. M., Ferrando, S., Maclaine, J. S., Kelsh, R. N., Ramsey, A., Abel R. L. &  
1116 Cox P. L. J. Functional nasal morphology of chimaeroid fishes. *Journal of Morphology* **274**:  
1117 987-1009 (2013).
- 1118 Hu, Y., Lu, J. & Young, G. C. New findings in a 400 million-year-old Devonian placoderm shed light  
1119 on jaw structure and function in basal gnathostomes. *Scientific Reports* **7**: 7813.  
1120 DOI:10.1038/s41598-017-07674-y (2017).
- 1121 Janvier, P. *Les Céphalaspides du Spitsberg. Anatomie, phylogénie et systématique des Ostéostracés*  
1122 *siluro-dévonien. Révision des Ostéostracés de la Formation de Wood Bay (Dévonien inférieur*  
1123 *du Spitsberg)* (Cahiers de Paléontologie, Section Vertébrés, Centre National de la Recherche  
1124 Scientifique, 1985).
- 1125 Janvier, P. *Early Vertebrates* (Oxford Univ. Press, 1996).
- 1126 Janvier, P. & Maisey, J. G. (2010) in *Morphology, Phylogeny and Paleobiogeography of Fossil*  
1127 *Fishes*. (eds Elliot, D.K., Maisey, J.G., Yu, X. & Miao, D.) 431–459 (Friedrich Pfeil, 2010).
- 1128 Jarvik, E. Middle and Upper Devonian Porolepiformes from East Greenland with special reference to  
1129 *Glyptolepis groenlandica* n. sp. *Meddelelser om Grønland* **187**, 1-307 (1972).
- 1130 Jarvik, E. in *Problems in Vertebrate Evolution*. (eds Andrews, S. M., Miles, R. S., Walker & A. D.)  
1131 199-225 (Linnean Symposium Series, London, 1977).
- 1132 Jarvik, E. *Basic Structure and Evolution of Vertebrates* (Academic, 1980).
- 1133 Johanson, Z. Placoderm branchial and hypobranchial muscles and origins in jawed vertebrates.  
1134 *Journal of Vertebrate Paleontology* **23**, 735-749 (2003).
- 1135 Johanson, Z., Underwood, C., Coates, M. I., Fernandez, V., Clark, B., Smith, M. M. (in press, 2020) .  
1136 The stem-holocephalan Helodus (Chondrichthyes; Holocephali) and the evolution of modern  
1137 chimaeroid dentitions. In: John Maisey symposium, Ichthyol explanation freshwaters (eds.  
1138 Denton, J., Pradel, A. & Janvier, P.). (Verlag Pfeil, 2020).

- 1139 Karatajūte-Talimaa, V. in *Fossil Fishes as Living Animals* (ed. Mark-Kurik, E.) 223-232 (Academy of  
1140 Sciences of Estonia, Tallinn, 1992).
- 1141 Kesteven, H. L. The anatomy of the head of *Callorhynchus antarcticus*. *Journal of Anatomy* **67**, 443-  
1142 474 (1937).
- 1143 King B., Qiao T., Lee M. S. Y., Zhu M. & Long J.A. Bayesian morphological clock methods resurrect  
1144 placoderm monophyly and reveal rapid early evolution in jawed vertebrates. *Syst. Biol.* **2016**,  
1145 syw107 (doi:10.1093/sysbio/syw107) (2016).
- 1146 Lane, J. A. Morphology of the braincase in the Cretaceous hybodont shark *Tribodus linnae*  
1147 (Chondrichthyes: Elasmobranchii), based on CT scanning. *Amer. Mus. Novitates* **2758**, 1-70  
1148 (2010).
- 1149 Lane, J. A. & Maisey, J. G. Pectoral anatomy of *Tribodus limae* (Elasmobranchii: Hybodontiformes)  
1150 from the Lower Cretaceous of Northeastern Brazil. *Journal of Vertebrate Paleontology* **29**, 25-  
1151 38 (2009).
- 1152 Lane, J. A. & Maisey, J. G. The visceral skeleton and jaw suspension in the durophagous hybodontid  
1153 shark *Tribodus limae* from the Lower Cretaceous of Brazil. *Journal of Paleontology* **86**, 886-  
1154 905 (2012).
- 1155 Liem, K., & Summers, A. P. in *Sharks, Skates, and Rays, the Biology of Elasmobranch Fishes* (ed.  
1156 Hamlett, W. C.) 93-114 (Johns Hopkins University, 1999).
- 1157 Long, J. A. A new diplacanthoid acanthodian from the Late Devonian of Victoria. *Memoirs of the*  
1158 *Association of Australasian Palaeontologists* **1**, 51-65 (1983).
- 1159 Long, J. A. A new osteolepidid fish from the Upper Devonian Gogo Formation, Western Australia.  
1160 *Records of the Western Australia Museum* **12**, 361-377 (1985).
- 1161 Long, J. A. A new camuropiscid arthrodire (Pisces: Placodermi) from Gogo, Western Australia.  
1162 *Zoological Journal of the Linnean Society* **94**, 233-258 (1988a).
- 1163 Long, J. A. New palaeoniscoid fishes from the Late Devonian and Early Carboniferous of Victoria.  
1164 *Memoirs of the Association of Australian Palaeontologists* **7**, 1-64 (1988b).
- 1165 Long, J. A. Ptyctodontid fishes (Vertebrata, Placodermi) from the Late Devonian Gogo Formation,  
1166 Western Australia, with a revision of the European genus *Ctenurella* Orvig, 1960. *Geodiversitas*  
1167 **19**, 515-555. (1997).
- 1168 Long, J. A. *The Rise of Fishes* second edition (John Hopkins Univ. Press, 2011).
- 1169 Long, J. A., Barwick, R. E., & Campbell. Osteology and functional morphology of the osteolepiform  
1170 fish *Gogonaspis andrewsae* Long 1995, from the Upper Devonian Gogo Formation, Western  
1171 Australia. *Records of the Western Australian Museum Supplement* **53**, 1-89 (1997).
- 1172 Long, J. A., Burrow, C. J., Ginter, M., Maisey, J., Trinajstić, K. M., Coates, M. I., Young, G. C. &  
1173 Senden, T. J. First shark from the Late Devonian (Frasnian) Gogo Formation, Western Australia  
1174 sheds new light on the development of tessellated calcified cartilage. *PLoS ONE* **10**: e0126066  
1175 DOI:10.1371/journal.pone.0126066 (2015).
- 1176 Long, J. A., Mark-Kurik, E., Johanson, Z., Lee, M. S. Y., Young, G. C., Zhu, M., Ahlberg, P. E.,  
1177 Newman, M., Jones, R., den Blaauwen, J., Choo, B. & Trinajstić, K. Copulation in antiarch  
1178 placoderms and the origin of gnathostome internal fertilization. *Nature* **517**, 196-199 (2015).
- 1179 Long, J. A., Trinajstić, K. M., & Johanson, Z. Devonian arthrodire embryos and the origin of internal  
1180 fertilization in vertebrates. *Nature* **457**, 1124-1127 (2009).
- 1181 Long, J. A., Young, G. C., Holland, T., Senden, T. J. & Fitzgerald, E. M. G. An exceptional Devonian  
1182 fish from Australia sheds light on tetrapod origins. *Nature* **444**, 199-202 (2006).
- 1183 Lu, J., Giles, S., Friedman, M., den Blaauwen, J. L. & Zhu, M. The oldest actinopterygian highlights  
1184 the cryptic early history of the hyperdiverse ray-finned fishes. *Current Biology* **26**, 1-7 (2016).

- 1185 Lund, R. *Harpagofututor volsellorhinus* new genus and species (Chondrichthyes,  
1186 Chondrenchelyiformes) from the Namurian Bear Gulch Limestone, *Chondrenchelys*  
1187 *problematica* and their sexual dimorphism. *Journal of Paleontology* **56**, 938-958 (1982).
- 1188 Lund, R. The morphology of *Falcatus falcatus* (St. John and Worthen), a Mississippian stethacanthid  
1189 chondrichthyan from the Bear Gulch Limestone of Montana. *Journal of Vertebrate Paleontology*  
1190 **5**, 1-19 (1985).
- 1191 Lund, R. On *Damocles serratus* nov. gen. et sp., (Elasmobranchii: Cladodontida) from the Upper  
1192 Mississippian Bear Gulch Limestone of Montana. *Journal of Vertebrate Paleontology* **6**, 12-19  
1193 (1986).
- 1194 Lund, R. & Grogan, E. D. Relationships of the Chimaeriformes and the basal radiation of the  
1195 Chondrichthyes. *Reviews in Fish Biology and Fisheries* **7**, 65-123 (1997).
- 1196 Lund, R. & Grogan, E. D. in *Recent Advances in the Origin and Early Radiation of Vertebrates* (eds  
1197 Arratia, G., Wilson, M. V. H. & Cloutier, R.) 171-187 (Friedrich Pfiel, 2004a).
- 1198 Lund, R. & Grogan, E. D. in *Recent Advances in the Origin and Early Radiation of Vertebrates* (eds  
1199 Arratia, G., Wilson, M. V. H. & Cloutier, R.) 505-531 (Friedrich Pfiel, 2004b).
- 1200 Maisey, J. G. The anatomy and interrelationships of Mesozoic hybodont sharks. *Am. Mus. Novit.* **2724**,  
1201 1-48 (1982).
- 1202 Maisey, J. G. Cranial anatomy of *Hybodus basanus* Egerton from the Lower Cretaceous of England.  
1203 *Am. Mus. Novit.* **2758**, 1-64 (1983).
- 1204 Maisey, J. G. Cranial Morphology of the Fossil Elasmobranch *Synechodus dubrisiensis*. *Am. Mus.*  
1205 *Novit.* **2804**, 1-28 (1985).
- 1206 Maisey, J. G. Visceral skeleton and musculature of a Late Devonian shark. *J. Vertebr. Paleontol.* **9**,  
1207 174-190 (1989a).
- 1208 Maisey, J. G. *Hamiltonichthys mapei* g. & sp. nov. (Chondrichthyes; Elasmobranchii), from the  
1209 Upper Pennsylvanian of Kansas. *American Museum Novitates* **2931**, 1-42 (1989b).
- 1210 Maisey, J. G. in *Major Events in Early Vertebrate Evolution* (ed. Ahlberg, P. E.) 263-288 (Taylor and  
1211 Francis, 2001a).
- 1212 Maisey, J. G. Remarks on the inner ear of elasmobranchs and its interpretation from skeletal labyrinth  
1213 morphology. *J. Morph.* **250**, 236-264. (2001b).
- 1214 Maisey, J. G. Braincase of the Upper Devonian shark *Cladodoides wildungensis* (Chondrichthyes,  
1215 Elasmobranchii), with observations on the braincase in early chondrichthyans. *Bull. Am. Mus.*  
1216 *Nat. Hist.* **288**, 1-103 (2005).
- 1217 Maisey, J. G. The braincase in Paleozoic symmoriiform and cladoselachian sharks. *Bull. Am. Mus.*  
1218 *Nat. Hist.* **307**, 1-122 (2007).
- 1219 Maisey, J. G. The postorbital palatoquadrate articulation in elasmobranchs. *Journal of Morphology*  
1220 **269**, 1022-1040 (2008).
- 1221 Maisey, J. G. The spine-brush complex in symmoriiform sharks (Chondrichthys; Symmoriiformes),  
1222 with comment on dorsal fin modularity. *Journal of Vertebrate Paleontology* **29**, 14-24 (2009).
- 1223 Maisey, J. G. The braincase of the Middle Triassic shark *Acronemus tuberculatus* (Bassani, 1886).  
1224 *Palaeontology* **54**, 417-428 (2011).
- 1225 Maisey, J. G. The diversity of tessellated calcification in modern and extinct chondrichthyans. *Revue*  
1226 *de Paléobiologie, Geneve* **32**, 355-371 (2013).
- 1227 Maisey, J. G. & Anderson, M. E. A primitive chondrichthyan braincase from the Early Devonian of  
1228 South Africa. *Journal of Vertebrate Paleontology* **21**, 702-713 (2001).
- 1229 Maisey, J. G. & de Carvalho, M. R. A new look at old sharks. *Nature* **385**, 779-780 (1997).

- 1230 Maisey, J. G., Janvier, P., Pradel, A., Denton, J. S. S., Bronson, A., Miller, R. & Burrow, C. J.  
 1231 *Doliodus* and pucapampellids. In *Evolution and Development of Fishes* (eds Johanson, Z.,  
 1232 Underwood, C. & Richter, M.) 87–109 (Cambridge, 2019).
- 1233 Maisey, J. G. & Lane, J. A. Labyrinth morphology and the evolution of low-frequency phonoreception  
 1234 in elasmobranchs. *C. R. Palevol* **9**, 289-309. (2010)
- 1235 Maisey, J. G., Miller, R. & Turner, S. The braincase of the chondrichthyan *Doliodus* from the Lower  
 1236 Devonian Campbellton Formation of New Brunswick, Canada. *Acta Zoologica* **90** (supplement  
 1237 1), 109-122 (2009).
- 1238 Maisey, J. G., Miller, R., Pradel, A., Denton, J. S. S., Bronson, A. & Janvier, P. Pectoral morphology  
 1239 in *Doliodus*: bridging the 'acanthodian'-chondrichthyan divide. *American Museum Novitates*  
 1240 **3875**, 1-15. (2017).
- 1241 Maisey, J. G., Turner, S., Naylor, G. J. P. & Miller, R. F. Dental patterning in the earliest sharks:  
 1242 implications for tooth evolution. *Journal of Morphology*. DOI:10.1002/jmor.20242 (2013)
- 1243 Mallat, J. The origin of the vertebrate jaw: neoclassical ideas versus newer, development-based ideas.  
 1244 *Zool. Sci.* **25**, 990-998 (2008).
- 1245 Marinelli, W. & Strenger, A. *Vergleichende Anatomie und Morphologie der Wirbeltiere*. III. 174-308  
 1246 (Franz Deuticke, Wien, 1959).
- 1247 Miles, R. S. in *Current problems of lower vertebrate phylogeny*. (ed. T. Ørving) 109-127 (Almqvist &  
 1248 Wiksell, Stockholm, 1968).
- 1249 Miles, R. S. Acanthodii. in *Encycl. Sci. Tech.* 33–34, (McGraw-Hill, 1971).
- 1250 Miles, R. S. Articulated acanthodian fishes from the Old Red Sandstone of England, with a review of  
 1251 the structure and evolution of the acanthodian shoulder- girdle. *Bull. Br. Mus. Nat. Hist. (Geol.)*  
 1252 **24**, 111–213 (1973a).
- 1253 Miles, R. S. in *Interrelationships of Fishes* (eds Greenwood, P. H., Miles, R. S. & Patterson, C.) 63–  
 1254 103 (Academic, 1973b).
- 1255 Miles, R. S. & Westoll, T. S. The placoderm fish *Coccosteus cuspidatus* Miller ex Agassiz from the  
 1256 Middle Old Red Sandstone of Scotland. *Transactions of the Royal Society of Edinburgh* **67**,  
 1257 373-476 (1968).
- 1258 Miles, R. S. & Young, G. C. in *Problems in Vertebrate Evolution*. (eds Andrews, S. M., Miles, R. S.,  
 1259 Walker & A. D.) 123–198 (Linnean Symposium Series, London, 1977).
- 1260 Miller, R. F., Cloutier, R. & Turner, S. The oldest articulated chondrichthyan from the Early Devonian  
 1261 period. *Nature* **425**, 501–504 (2003).
- 1262 Moy-Thomas, J. A. The structure and affinities of *Chondrenchelys problematica* Tr. *Proceedings of*  
 1263 *the Zoological Society, London* **1935**, 391-403 (1935).
- 1264 Mutter, R. J., de Blanger, K., & Neuman, A. G. Elasmobranchs from the Lower Triassic Sulphur  
 1265 Mountain Formation near Wapiti Lake (BC, Canada). *Zoological Journal of the Linnean Society*  
 1266 **149**, 309-37 (2007).
- 1267 Mutter, R. J., Neuman, A. G. & de Blanger, K. *Homalodontus* nom. nov. a replacement for *Wapitiodus*  
 1268 Mutter, de Blanger and Neuman 2007 (Homalodontidae nom. nov., ?Hybodontoidae),  
 1269 preoccupied by *Wapitiodus* Orchard, 2005. *Zoological Journal of the Linnean Society* **154**, 419-  
 1270 420 (2008).
- 1271 Moy-Thomas, J.A. & Miles, R. *Palaeozoic Fishes* 2<sup>nd</sup> edition (Chapman & Hall, 1971).
- 1272 Nelson, G. J. in *Current problems of lower vertebrate phylogeny*. (ed. T. Ørving) 129-143 (Almqvist &  
 1273 Wiksell, Stockholm, 1968).
- 1274 Nelson, G. J. Gill arches and the phylogeny of fishes, with notes on the classification of vertebrates.  
 1275 *Bull. Am. Mus. Nat. Hist.* **141**, 475–552 (1969).

- 1276 Nelson, G. J. Pharyngeal denticles (placoid scales) of sharks with notes on the dermal skeleton of  
1277 vertebrates. *Amer. Mus. Novitates* **2416**, 1-26 (1970).
- 1278 Newman, M. J., Davidson, R. G., den Blaauwen, J. L. & Burrow, C. J. The Early Devonian  
1279 acanthodian *Uraniacanthus curtus* (Powrie, 1870) n. comb., from the Midland Valley of  
1280 Scotland. *Geodiversitas* **34**, 739-759 (2012).
- 1281 Nielsen, E. Studies on Triassic fishes I. *Meddelelser om Grønland* **138**, 1–403 (1942).
- 1282 Oelofsen, B. W. in *Indo-Pacific Fish Biology: Proceedings of the Second International Conference on*  
1283 *Indo-Pacific Fishes*. (eds Uyeno, T., Arai, R., Taniuchi, T., Matsuura, K.) 107-124  
1284 (Ichthyological Society of Japan, Tokyo, 1986).
- 1285 Ørvig, T. Histological studies of placoderms and fossil elasmobranchs 1. The endoskeleton, with  
1286 remarks on the hard tissues of lower vertebrates in general. *Arkiv för Zoologie* **2**, 321-454  
1287 (1951).
- 1288 Ørvig, T. New finds of acanthodians, arthrodires, crossopterygians, ganoids and dipnoans in the upper  
1289 Middle-Devonian Calcareous Flags (Oberer Plattenkalk) of the bergisch-Paffrath Trough (prt 1).  
1290 *Paläontologische Zeitschrift* **34**, 295-335 (1960).
- 1291 Ørvig, T. in *Structural and Chemical organization of Teeth*. (ed. Miles, A. E. W.) 45-110 (Academic  
1292 Press, London 1967).
- 1293 Otto, M. Zur systematischen Stellung der Lophosteiden (Obersilur, Pisces inc. sedis).  
1294 *Paläontologische Zeitschrift* **65**, 345-350 (1991).
- 1295 Patterson, C. The phylogeny of the chimaeroids. *Philosophical Transactions of the Royal Society of*  
1296 *London*, Series B **249**, 101-219 (1965).
- 1297 Patterson, C. Morphology and interrelationships of primitive actinopterygian fishes. *American*  
1298 *Zoologist* **22**, 241-259 (1982).
- 1299 Patterson, C. Interpretation of the toothplates of chimaeroid fishes. *Zool. J. Linn. Soc.* **106**, 33-61  
1300 (1992).
- 1301 Pearson, D. M. & Westoll, T. S. The Devonian actinopterygian *Cheirolepis* Agassiz. *Trans. R. Soc.*  
1302 *Edinb.* **70**, 337–399 (1979).
- 1303 Pradel, A. Skull and brain anatomy of Late Carboniferous Sibirhynchidae (Chondrichthyes,  
1304 Iniopterygia) from Kansas and Oklahoma (USA). *Geodiversitas* **32**, 595-661 (2010).
- 1305 Pradel A., Didier, D., Casane, D., Tafforeau, P. & Maisey J. G. Holocephalan embryo provides new  
1306 information on the evolution of the glossopharyngeal nerve, metotic fissure and parachordal  
1307 plate in gnathostomes. *PLoS ONE* **8**: e66988 DOI:10.1371/journal.pone.0066988 (2013).
- 1308 Pradel A., Langer M., Maisey J. G., Geffard-Kuriyama D., Cloetens P., Janvier P., & Tafforeau P.  
1309 Skull and brain of a 300 million-year-old chimaeroid fish revealed by synchrotron  
1310 holotomography. *Proceedings of the National Academy of Sciences* **106**, 5224-5228 (2009b).
- 1311 Pradel, A., Maisey, J. G., Tafforeau, P., & Janvier, P. An enigmatic gnathostome vertebrate skull from  
1312 the Middle Devonian of Bolivia. *Acta Zoologica* **90** (supplement 1), 123-133 (2009a).
- 1313 Pradel, A., Maisey, J. G., Tafforeau, P., Mapes, R. H. & Mallatt, J. A Palaeozoic shark with  
1314 osteichthyan-like branchial arches. *Nature* **509**, 608-611 (2014).
- 1315 Pradel, A., Tafforeau, P. & Janvier P. Study of the pectoral girdle and fins of the Late Carboniferous  
1316 sibirhynchid iniopterygians (Vertebrata, Chondrichthyes, Iniopterygia) from Kansas and  
1317 Oklahoma (USA) by means of microtomography, with comments on iniopterygian  
1318 relationships. *Comptes Rendus Palevol* **9**, 377-387 (2010).
- 1319 Pradel A., Tafforeau P., Maisey J. G. & Janvier P. A new Paleozoic Symmoriiformes  
1320 (Chondrichthyes) from the Late Carboniferous of Kansas (USA) and Cladistic Analysis of Early  
1321 Chondrichthyans. *PLoS ONE* **6**: e24938 DOI:10.1371/journal.pone.0024938 (2011).
- 1322 Qu, Q.-M., Zhu, M. & Wang, W. Scales and dermal skeletal histology of an early bony fish *Psarolepis*

- 1323            *romeri* and their bearing on the evolution of rhombic scales and hard tissues. *PLoS One* **8**,  
1324            e61485 (2013a).
- 1325            Qu, Q., Sanchez, S., Blom, H., Tafforeau, P. & Ahlberg P. E. Scales and Tooth Whorls of Ancient  
1326            Fishes Challenge Distinction between External and Oral ‘Teeth’. *PLoS ONE* **8**,  
1327            DOI:10.1371/journal.pone.0071890 (2013b).
- 1328            Qiao, T., King B., Long J. A., Ahlberg P. E., & Zhu M. Early Gnathostome Phylogeny Revisited:  
1329            Multiple Method Consensus. *PLoS ONE* **11**, DOI:10.1371/journal.pone.0163157 (2016).
- 1330            Reif, W.-E. Types of morphogenesis of the dermal skeleton in fossil sharks. *Paläont. Z.* **52**, 110-128  
1331            (1978).
- 1332            Reif, W.-E. Squamation and ecology of sharks. *Cour. Forsch.-Inst. Senckenberg* **78**, 1-255 (1985).
- 1333            Rieppel, O. A new genus of shark from the Middle Triassic of Monte San Giorgio, Switzerland.  
1334            *Palaeontology* **25**, 399-412 (1982).
- 1335            Ritchie, A. *Cowralepis*, a new genus of phyllolepid fish (Pisces, Placodermi) from the late Middle  
1336            Devonian of New South Wales, Australia. *Proc. Linn. Soc. N.S.W.* **126**, 215–259 (2005).
- 1337            Rücklin, M., Donoghue, P. C., Johansen, Z., Trinajstić, K., Marone, F. & Stampanoni, M.  
1338            Development of teeth and jaws in the earliest jawed vertebrates. *Nature* **491**, 748-751 (2012).
- 1339            Sansom, R. Phylogeny, classification and character polarity of the Osteostraci (Vertebrata). *Journal of*  
1340            *Systematic Palaeontology* **7**, 95-115 (2009).
- 1341            Schaeffer, B. The xenacanth shark neurocranium, with comments on elasmobranch monophyly. *Bull.*  
1342            *Am. Mus. Nat. Hist.* **169**, 1–66 (1981).
- 1343            Schultze, H.-P. & Märss, T. Revisiting *Lophosteus* Pander 1856, a primitive osteichthyan. *Acta*  
1344            *Universitatis Latviensis* **679**, 57-78 (2004).
- 1345            Schultze, H.NP. & J. Zidek. Ein primitiver acanthodier (Pisces) aus dem Unterdevon Lettlands.  
1346            *Paläontologische Zeitschrift* **56**, 95-105 (1982).
- 1347            Seidel, R., Lyons, K., Blumer, M., Zalansky, P., Fratzl, P., Weaver, J. C. & Dean, M. N.  
1348            Ultrastructural and developmental features of the tessellated endoskeleton of elasmobranchs  
1349            (sharks and rays). *J. Anat.* DOI:10.1111/joa.12508 (2016).
- 1350            Sequeira, S. E. K. & Coates, M. I. Reassessment of 'Cladodus' neilsoni Traquair: a primitive shark  
1351            from
- 1352            Smith, M. M. & Sansom, I. J. in *Development, Function and Evolution of Teeth*. (eds Teaford, M. F.,  
1353            Smith, M. M. & Ferguson, M. W. J.) 65-81 (Cambridge University Press, Cambridge, 2000).
- 1354            Solér-Gijon, R. & Hampe, O. Evidence of *Triodus* Jordan 1849 (Elasmobranchii: Xenacanthidae) in  
1355            the Lower Permian of the Autun basin (Muse, France). *N. Jb. Geol. Paläont. Mh.* **1998**, 335-348  
1356            (1998).
- 1357            Stahl, B. J. in *Handbook of Paleoichthyology* Vol. 4 (ed. Schultze, H.-P.) (Friedrich Pfeil, München.  
1358            1999).
- 1359            Stensiö, E. A. On the head of the macropetalichthyids, with certain remarks on the head of the other  
1360            arthrodires. *Publications of the Field Museum of Natural History (Geology)* **4**, 87-197 (1925).
- 1361            Stensiö, E. A. Anatomical studies on the arthrodiran head (Part I). *K. Sv. Vet. Akad. Handl. Ser. 4., Bd.*  
1362            **8, Nr. 1.** 8 (1963).
- 1363            Stensiö, E. in *Traité de Paléontologie* (ed. Piveteau, J.) 71-692 (Masson, Paris, 1969).
- 1364            Swofford, D. L. *PAUP\*. Phylogenetic analysis using parsimony (\* and other methods), version*  
1365            *4.0a147* (Sinauer, Sunderland, 2003).
- 1366            Swofford, D. L. & Maddison, W. P. Reconstructing ancestral character states under Wagner  
1367            parsimony. *Math. Biosci.* **87**, 199-229 (1987).



- 1368 Thomson, K. S. The endocranium and associated structures in the Middle Devonian rhipidistian fish  
1369 *Osteolepis*. *Proceedings of the Linnean Society of London* **176**, 181-195 (1965).
- 1370 Trinajstić, K., Long, J. A., Johanson, Z., Young, G. and Senden, T. New morphological information on  
1371 the ptyctodontid fishes (Placodermi, Ptyctodontida) from Western Australia. *Journal of*  
1372 *Vertebrate Paleontology* **32**: 757-780 (2012).
- 1373 Trinajstić, K., Boisvert, C., Long, J., Maksimenko, A. & Johanson, J. Pelvic and reproductive  
1374 structures in placoderms (stem gnathostomes). *Biol. Rev.* (2014) 1-35.
- 1375 Tucker A. S. & Fraser, G. J. Evolution and developmental diversity of tooth regeneration. *Semin Cell*  
1376 *Dev Biol* DOI:10.1016/j.semcdb.2013.12.013 (2014).
- 1377 Turner, S., Burrow, C. J. & Warren, A. *Gyracanthides hawkinsi* sp. nov. (Acanthodii, Gyracanthidae)  
1378 from the Lower Carboniferous of Queensland, Australia, with a review of gyracanthid taxa.  
1379 *Palaeontology* **48**, 963-1006 (2005).
- 1380 Valiukevicius, J. in *Fossil Fishes as Living Animals* (ed. Mark-Kurik, E.) 193-213 (Academy of  
1381 Sciences of Estonia, Tallinn, 1992).
- 1382 Warren, A., Currie, B. P., Burrow, C. & Turner, S. A redescription and reinterpretation of  
1383 *Gyracanthides murrayi* Woodward 1906 (Acanthodii, Gyracanthidae) from the Lower  
1384 Carboniferous of the Mansfield Basin, Victoria, Australia. *Journal of Vertebrate Paleontology*  
1385 **20**, 225-242 (2000).
- 1386 Watson, D. M. S. The acanthodian fishes. *Philosophical Transactions of the Royal Society of London*  
1387 *B* **228**, 49-146 (1937).
- 1388 Wang, N.-Z., Donoghue, P. C. J., Smith, M. M. & Sansom, I. J. Histology of the galeaspid  
1389 dermoskeleton and endoskeleton, and the origin and early evolution of the vertebrate cranial  
1390 endoskeleton. *Journal of Vertebrate Paleontology* **25**, 745-756 (2005).
- 1391 Westoll, T. S. On the structures of the dermal ethmoid shield of *Osteolepis*. *Geological Magazine* **73**,  
1392 157-171 (1936).
- 1393 Williams, M. E. A new specimen of *Tamiobatis vetustus* (Chondrichthyes, Ctenacanthoidea) from the  
1394 Late Devonian Cleveland Shale of Ohio. *Journal of Vertebrate Paleontology* **18**, 251-260  
1395 (1998).
- 1396 Williams, M. E. Tooth retention in cladodont sharks: with a comparison between primitive grasping  
1397 and swallowing, and modern cutting and gouging feeding mechanisms. *Journal of Vertebrate*  
1398 *Paleontology* **21**, 214-226 (2001).
- 1399 Woodward, A. S. & White, E. I. The dermal tubercles of the Upper Devonian shark, *Cladoseleche*.  
1400 *Annals and Magazine of Natural History* **11**, 367-368 (1938).
- 1401 Young, G. C. New information on the structure and relationships of *Buchanosteus* (Placodermi:  
1402 Euarthrodira) from the Early Devonian of New South Wales. *Zool. J. Linn. Soc.* **66**, 309-352  
1403 (1979).
- 1404 Young, G. C. A new early Devonian placoderm from New South Wales, Australia, with a discussion  
1405 of placoderm phylogeny. *Palaeontographica* **A167**, 10-76 (1980).
- 1406 Young, G. C. Devonian sharks from South-Eastern Australia and Antarctica. *Palaeontology* **25**, 817-  
1407 843 (1982).
- 1408 Young, G. C. Reconstruction of the jaws and braincase in the Devonian placoderm fish *Bothriolepis*.  
1409 *Palaeontology* **27**, 625-661 (1984).
- 1410 Young, G. C. The relationships of placoderm fishes. *Zool. J. Linn. Soc.* **88**, 1-57 (1986).
- 1411 Young, G. C. Antiarchs (placoderm fishes) from the Devonian Aztec sandstone, southern Victorian  
1412 Land, Antarctica. *Palaeontographica*, **A 202**, 1-125 (1988).

- 1413 Young, G. C., Lelièvre, H. & Goujet, D. Primitive jaw structure in an articulated brachythoracid  
1414 arthrodire (placoderm fish; Early Devonian) from southeastern Australia. *Journal of Vertebrate*  
1415 *Paleontology* **21**, 670-678 (2001).
- 1416 Yu, X. A new porolepiform-like fish, *Psarolepis romeri*, gen. et sp. nov. (Sarcopterygii, Osteichthyes)  
1417 from the Lower Devonian of Yunnan, China. *J. Vertebr. Paleontol.* **18**, 261-264 (1998).
- 1418 Zangerl, R. in *Handbook of Paleichthyology* Vol. 3A (ed. Schultze, H.-P.) (Gustav Fischer Verlag,  
1419 Stuttgart, 1981).
- 1420 Zangerl, R. Two new stethacanthid sharks (Stethacanthidae, Symmoriida) from the Pennsylvanian of  
1421 Indiana, USA. *Palaeontographica*, A, **213**, 115–141 (1990).
- 1422 Zangerl, R. & Case, G. R. Iniopterygia, a new order of chondrichthyan fishes from the Pennsylvanian  
1423 of North America. *Fieldiana: Geology* **6**, 1-67 (1973).
- 1424 Zangerl, R. & Case, G. R. *Cobelodus aculeatus* (Cope), anacanathous shark from Pennsylvanian  
1425 black shales of North America. *Palaeontographica*, A, **154**, 107–157 (1976).
- 1426 Zhang, G.-R., Wang, J.-Q. & Wang, N.-Z. The structure of pectoral fin and tail of Yunnanolepidoidei,  
1427 with a discussion of the pectoral fin of chuchinolepids. *Vertebrat. Palasiatic.* **39**, 1–13 (2001).
- 1428 Zhu, M. & Ahlberg, P. E. The origin of the internal nostril of tetrapods. *Nature* **432**, 94-97 (2004).
- 1429 Zhu, M., Ahlberg, P., Pan, Z., Zhu, Y., Qiao, T., Zhao, W., Jia, L. & Lu, J. A Silurian maxillate  
1430 placoderm illuminates jaw evolution. *Science* **354**, 334-336 (2016).
- 1431 Zhu, M. & Schultze, H. P. The oldest sarcopterygian fish. *Lethaia* **30**, 293-304 (1997).
- 1432 Zhu, M. & Schultze, H. P. in *Major Events in Early Vertebrate Evolution (Palaeontology, phylogeny,*  
1433 *genetics, and development)*. (ed. Ahlberg, P. E.) 289–314 (Taylor and Francis, 2001).
- 1434 Zhu, M & Yu, X. A primitive fish close to the common ancestor of tetrapods and lungfish. *Nature*  
1435 **418**, 767-770 (2002).
- 1436 Zhu, M. & Yu, X.-B. in *Recent Advances in the Origin and Early Radiation of Vertebrates* (eds  
1437 Arratia, G., Wilson, M. V. H. & Cloutier, R.) 271-286 (Verlag Dr. Friedrich Pfeil, 2004).
- 1438 Zhu, M., Yu, X., & Ahlberg, P. E. A primitive sarcopterygian fish with an eyestalk. *Nature* **410**, 81-84  
1439 (2001).
- 1440 Zhu, M., Yu, X., Ahlberg, P. E., Choo, B., Lu, J., Qiao, Q., Zhao, L. J., Blom, H., & Zhu, Y. A  
1441 Silurian placoderm with osteichthyan-like marginal jaw bones. *Nature* **52**, 188-193 (2013).
- 1442 Zhu, M., Yu, X. & Janvier, P. A primitive fossil fish sheds light on the origin of bony fishes. *Nature*  
1443 **397**, 607–610 (1999).
- 1444 Zhu, M., Yu, X.-B., Choo, B., Wang, J.-Q. & Jia, L.-T. An antiarch placoderm shows that pelvic  
1445 girdles arose at the root of jawed vertebrates. *Biol. Lett.* **8**, 453–456 (2012).
- 1446 Zhu, M., Yu, X.-B., Wang, W., Zhao, W.-J. & Jia, L.-T. A primitive fish provides key characters  
1447 bearing on deep osteichthyan phylogeny. *Nature* **441**, 77-80 (2006).
- 1448 Zhu, M., Wang, W. & Yu, X.-B. *Meemannia eos*, a basal sarcopterygian fish from the Lower  
1449 Devonian of China -expanded description and significance. In *Morphology, Phylogeny and*  
1450 *Paleobiogeography of Fossil Fishes*. D. K. Elliot, J. G. Maisey, X.-B. Yu & D.-S. Miao, eds  
1451 (München: Verlag Dr. Friedrich Pfeil), pp. 199-214. (2010).
- 1452 Zhu, M., Zhao, W., Jia, L., Lu, J., Qiao, T. & Qu, Q. The oldest articulated osteichthyan reveals a  
1453 mosaic of gnathostome characters. *Nature* **458**, 469-474 (2009).
- 1454 Zidek, J. Late Pennsylvanian Chondrichthyes, Acanthodii, and deep-bodied Actinopterygii from the  
1455 Kinney Quarry, Manzanita Mountains, New Mexico. In *Geology and paleontology of the Kinney*  
1456 *Brick Quarry, Late Pennsylvanian, central New Mexico*. J. Zidek ed. Bulletin 138, New Mexico  
1457 Bureau of Mines & Mineral Resources (Socorro: New Mexico Bureau of Mines & Mineral  
1458 Resources), pp. 199-214. (1992).
